1 **Cross-reactive TCR with alloreactivity for**  
2 **immunodominant HIV-1 epitope Gag TL9 with**  
3 **enhanced control of viral infection**

4

5

6

7 **Authors:**

8 Yang Liu<sup>1</sup>, Dan San<sup>1</sup>, Lei Yin<sup>1#</sup>

9

10 **Affiliation:**

11 <sup>1</sup>State Key Laboratory of Virology, Hubei Key Laboratory of Cell Homeostasis, College  
12 of Life Sciences, Wuhan University, Wuhan, Hubei Province, 430072, China.

13 #: To whom correspondence should be addressed:

14 E-mail: [yinlei@whu.edu.cn](mailto:yinlei@whu.edu.cn) Tel: +86-27-68753957

15

16

17

18

19

20

21

22

23

## 24 **ABSTRACT**

25 Although both HLA B\*81:01 and HLA B\*42:01 are members of the B7 supertype and  
26 can present many of the same HIV-1 epitopes, the identification of a dual-reactive T-  
27 cell phenotype was unexpected, since structural data suggested that TL9 peptide binds  
28 to each allele in a distinct conformation. How the dual-reactive TCR recognizes these  
29 radically distinct p-MHC surfaces is revealed by our structural study, that the  
30 introduction of TCR T18A induces a molecular switch of the TL9 peptide in B4201 to  
31 approach its conformation in B8101. Most importantly, unique docking of CDR3 $\beta$   
32 towards MHC but not peptide ligand strengthens the peptide tolerance of T18A,  
33 extends the ability of TCR to adapt mutations. Moreover, the high affinity of dual-  
34 reactive TCR for WT and escape mutant TL9 highlights the functional advantage of the  
35 alloreactive phenotype.

36

## 37 **INTRODUCTION**

38 Antigen-specific T cell immunity is a fundamental ‘law’ of immunology, that is, T cell  
39 responses are highly specific and are developmentally restricted to the recognition of  
40 self-HLA (Jameson, S.C., Hogquist, K.A., and Bevan, 1995; R M Zinkernagel, 1974a) by T  
41 cell receptor (TCR). Most T cells recognize only certain antigens presented by certain  
42 host-derived HLA molecules. However, as we previously described, T cells are often  
43 cross-reactive with different antigens and different HLAs. Some T cells can break the  
44 restriction of HLA and can also react directly with HLA molecules from unrelated  
45 individuals (Colf et al., 2007; Felix and Allen, 2007; L A Sherman, 1993), which is called

46 'alloreactivity' and can induce extra immune responses. Such alloreactivity is harmful  
47 to transplanted cells that patients with some HLA mismatches can have severe T cell  
48 immune responses and result in poor results of transplantation, known as taboo  
49 mismatches(Doxiadis et al., 1996; Kawase et al., 2007). And many pieces of evidence  
50 showed T cell cross-restriction is a major cause of tissue transplant-related morbidity  
51 and mortality(K Fleischhauer, N A Kernan, R J O'Reilly, B Dupont, 1990; Macdonald et  
52 al., 2003; Mifsud et al., 2008).

53 How T cell receptor recognizes MHC and peptide and how they play the vital roles  
54 in controlling diseases or inducing diseases attracts popular interests(R M Zinkernagel,  
55 1974b)<sup>-13</sup>. As for alloreactivity reactions, most of the researches aims at the injury they  
56 induced for self-tissues. We wondering if alloreactivity reactions could play good roles  
57 naturally or even artificially. Similar situations have been noted by our previous studies  
58 in other kinds of cross-reactivity. We previously reported that the T cell with the same  
59 TCR could be cross-reactive to both MHC I and MHC II positive cells. In some HIV  
60 patients CD8<sup>+</sup> T cells that are trained to recognize MHC I with their TCR were turned to  
61 recognize MHC II since CD4<sup>+</sup> T cells had been hugely destroyed by the virus. Also in the  
62 case of tumor immunotherapy, tumor-reactive T cells can be cross-reactive with  
63 altered tumor antigen. And when cross-activated these T cells can kill tumor cells and  
64 be protective from the tumor. Recently, A subset of T cells that cross-recognized the  
65 TL9 epitope bound by B\*81:01 or B\*42:01 alleles was identified in HIV-infected  
66 people(Ogunshola et al., 2018), despite the absence of one allele. And these cross-  
67 reactive T cells are correlated with the better outcome for HIV-infected patients, which

68 showed the potential for clinical therapy. Why this alloreactivity happened and how it  
69 can be protective from HIV attracts our interests.

70 Although multiple HLA-B alleles can present the TL9 epitope, the frequency and  
71 pattern of TL9 epitope mutations are distinct, and have different effects on HIV-1  
72 replication ability(Edwards et al., 2002; Frater et al., 2007; Leslie et al., 2006a; Ntale et  
73 al., 2012). Several explanations were raised for the differential selection pressure  
74 exerted on HIV-1 by closely related HLA alleles, including various TCR clonotype usage,  
75 different TCR affinities resulting in different cross-recognition properties for TL9  
76 variants(Geldmacher et al., 2009a; Kløverpris et al., 2016; Leslie et al., 2006b), and the  
77 completely distinct interact surface presented by TL9 in HLA-B\*81:01 and HLA-  
78 B\*42:01(Kløverpris et al., 2015a). A phenomenon is suggested by these factors: there  
79 are different escape pathways of HIV-1 to adapt to different selection pressures when  
80 confronted with the CD8<sup>+</sup>T cell response targeting the same epitope but restricted by  
81 different HLA molecules. At a population level, this may result in differential HLA-  
82 associated viral replication capacity and disease prognosis(Carlson et al., 2012).

83 In this study, we investigate the mechanism of the high-affinity CD8<sup>+</sup>T cell  
84 response to immunodominant HIV-1 epitope Gag-TL9 by first reporting its TCR-pHLA  
85 ternary-complex structure. In addition, the cross-restriction structure of the same TCR  
86 was determined, showing the T18A adopts very similar binding orientations although  
87 the conformation of the peptide Gag-TL9 are largely different when Gag-TL9 bound to  
88 its host-selecting B\*81:01-TL9 and allogeneic B\*42:01-TL9 molecules. To be cross-  
89 reactive with both, CDR3 $\beta$  of T18A adapts a rare docking position over the



90 conservative MHC surface to avoid contacting the peptide. Moreover, an unusual open  
91 form of V $\alpha$  (the  $\beta$  sheet usually formed by J $\beta$  and V $\beta$  are not formed) was used for  
92 recognizing both alleles, and interestingly this unusual open form was firstly reported  
93 for cross-reactively interacting with MHCI and MHC II in our previous study(Yin et al.,  
94 2011). In the context of this unusual alloreactive TCR, TL9 peptide exhibited dramatic  
95 plasticity when bound to B\*42:01 upon TCR introduction and adopt a new  
96 conformation closer to its configuration in B\*81:01 context, which indicates an  
97 induced-fit molecular adaptation mechanism for recognizing conformational different  
98 peptides. Thus the ability of the high tolerance for recognizing altered peptides might  
99 ensure the recognition for the mutants of TL9 and maintain the immune responses for  
100 HIV. Therefore, the study of this naturally unexpected cross-reactivity highlights the  
101 fundamental basis for alloreactivity in chronic virus infection and key points for  
102 controlling HIV by the immune system.

103

## 104 **RESULT**

### 105 **Overview of the crystal structure of T18A/HLA-B\*81:01/TPQDLNTML and T18A/HLA-** 106 **B\*42:01/TPQDLNTML complex**

107 To critically examine why T18A TCR can creatively bind to distinct antigen-presenting  
108 surfaces in different HLA contexts, we determined the structure of T18A and  
109 TPQDLNTML in the B\*81:01 and B\*42:01 complexes. The statistics of the crystals were  
110 described in table S1, and the structures of the ternary complexes were shown (Figure  
111 1A, C). The T18A TCR combines pMHC in a traditional diagonal manner, with a total

112 buried surface area(Lesk and Chothia, 1987) (BSA) of 1732.6 and 1613.1 Å<sup>2</sup> in B\*81:01  
113 and B\*42:01 background, respectively, which fell within the range of known  
114 BSA(Rossjohn et al., 2015). The relative contact footprints of the complementarity  
115 determining region (CDR) loops at the TCR-pHLA interfaces were very similar (Fig.1B,  
116 D). Not all of the CDR loops contribute equally to the interaction, CDR3 $\alpha$ , CDR3 $\beta$ ,  
117 CDR2 $\beta$  dominate the interaction on the TCR-pMHC interface of both complexes. In the  
118 T18A/HLA-B\*81:01/TPQDLNTML complex, the dominant contribution of V $\beta$  domains  
119 was observed at the interface (V $\alpha$  40.2%; V $\beta$  59.7%). In the  
120 T18A/B\*42:01/TPQDLNTML complex, different involvement of variable domains (V $\alpha$   
121 38.4%; V $\beta$  61.5%) was observed. There was one salt bridge (CDR3 $\beta$ -D100 with  
122 B\*81:01-R153, CDR3 $\beta$ -D100 with B\*42:01 R153) at the interface of both complexes,  
123 but the T18A/B\*81:01/TPQDLNTML complex formed more hydrogen bonds (Table S2).  
124 TL9 peptides contribute 16% to the BSA in the B\*81:01 complex, and 15 % in the  
125 B\*42:01 complex.

126 The CDR3 $\alpha$  and CDR2 $\beta$  of the T18A sit above the peptide in both complexes and  
127 dominate the interaction between TCR and peptide (CDR3 $\alpha$  52%, CDR2 $\beta$  39% in B8101,  
128 CDR3 $\alpha$  50%, CDR2 $\beta$  41% in B4201). T18A adapts a docking angle of 43° across the  
129 antigen-binding groove in both complexes, and no dramatic sliding of the TCR on the  
130 pMHC surface is found. To conclude, although the conformation of TL9 differs under  
131 the restriction of B81 or B42, and the polymorphism of B81 and B42  $\alpha$ -helical residues  
132 also contributes to the different contact surfaces, TCR T18As adopt similar positions at  
133 the pMHC interface across B\*81:01 and B\*42:01 restriction.

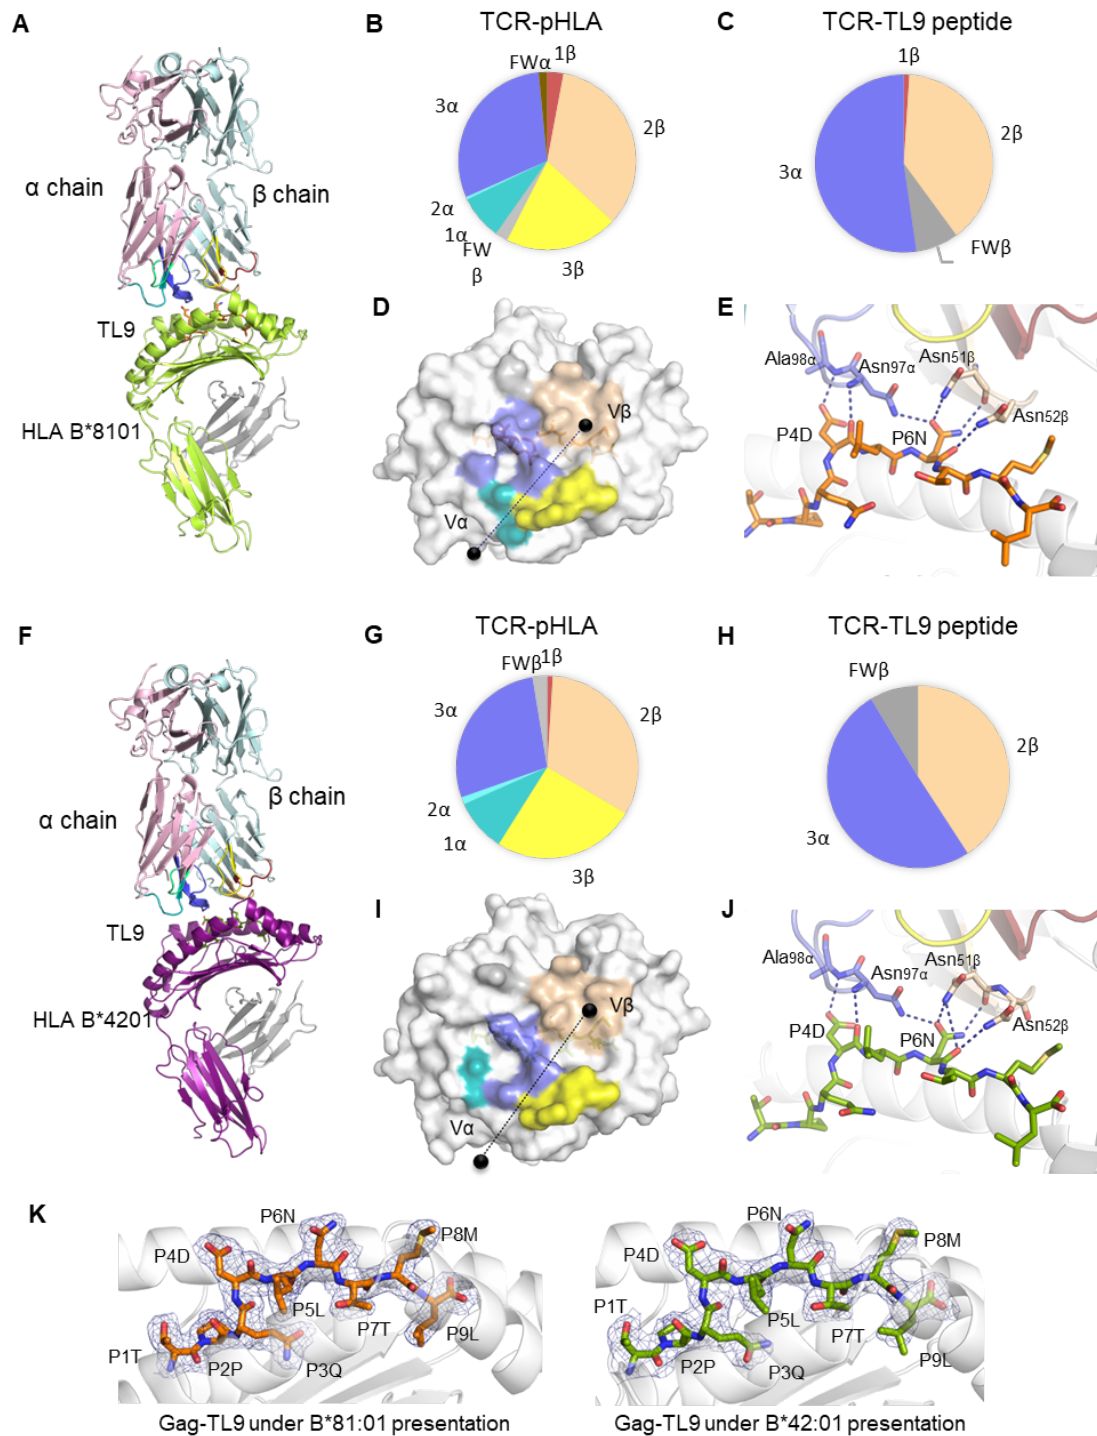

134

135 **Figure 1. T18A TCR cross-recognition of the TL9 epitope presented by HLA-B8101 and HLA-B4201**

136 **alleles.** (A). The T18A TCR (T18Aα in pale pink, T18Aβ in pale cyan) recognize TL9 presented by HLA-

137 B8101. Heavy chain of HLA-B8101, and HLA-B4201 are shown in limon, and purple, respectively.

138 The CDR1α, CDR2α, and CDR3α loops are shown in teal, limegreen, and blue, whereas the CDR1β,

139 CDR2β, and CDR3β loops are shown in firebrick, light orange, and yellow, respectively. (B) Pie charts

140 show the contribution of TCR segments toward the pHLA complex. (C). Interactions of TCR towards  
141 peptide. (D). The footprint of T18A TCR on the surface of HLA-B8101-TL9 complex. The colors  
142 correspond to TCR segment showed in pie chat; the center mass of V $\alpha$  and V $\beta$  domains were  
143 represented by black spheres. (E). Detailed interactions of T18A TCR with Gag-TL9 epitope in the  
144 context of HLA-B8101. Blue dashes denote hydrogen bonds; peptide amino acids are indicated in  
145 single-letter abbreviations and TCR residues are labeled in three-letter abbreviations. The colors  
146 correspond to TCR segment showed in pie chat. (F) The T18A TCR recognize TL9 presented by HLA-  
147 B4201. (G-J) Similar profiles as (B-E) of T18A TCR but on the surface of HLA-B4201-TL9. (K). Refined  
148 maps (2Fo-Fc) of the peptide in HLA-B complexes. The HLA molecules are represented in cartoon,  
149 and the peptides are represented as stick.

150 The online version of this article includes the following source data for figure 1:

151 **Table S1.** Data collection and refinement statistics of TCR-peptide-HLA complexes.

152 **Table S2.** Contact table of T18A/HLA-B\*81:01/TL9 and T18A/HLA-B\*42:01/TL9

153

154 In the interaction between T18A TCR and HIV-1 Gag-TL9 epitope, CDR2 $\beta$  and  
155 CDR3 $\alpha$  loops were the main contributors, which was characterized by strong  
156 hydrophilic interactions involving multiple asparagine. In the  
157 T18A/B\*81:01/TPQDLNTML complex (Fig.1E), CDR2 $\beta$  and CDR3 $\alpha$  loop dominated TCR-  
158 peptide interactions, and formed six hydrogen bonds with the peptide. Among them,  
159 the Asn97 and Ala98 residues of CDR3 $\alpha$  loop formed a hydrogen bond network with  
160 the P4D of the TL9 peptide, while Asn97 formed a hydrogen bond with the side chain  
161 of P6N. The Asn51 and Asn52 of CDR2 $\beta$  loop form three hydrogen bonds with the side

162 chain and backbone of P6D. In the T18A/B\*42:01/TPQDLNTML complex (Fig. 1J), the  
163 configuration of the peptide was almost the same as that of under B\*81:01  
164 presentation, which results in similar hydrophilic TCR-peptide-interactions. To further  
165 confirm this interesting observation, the electron density maps of the TL9 in B8101  
166 and B4201 presentation upon TCR binding were shown and compared (Fig 1K).

167

### 168 **'Induced-fit' mechanism of the TL9 peptide presentation upon TCR binding**

169 Next, we aimed to observe the configuration change of TL9 peptide before and after  
170 TCR accommodation. HIV Gag-TL9 epitope exhibits distinct conformations when  
171 presented by B8101 versus B4201 (Fig.2B), but adapts similar conformation after TCR  
172 binding in the context B8101 and B4201 based by our structural evidence (Fig.2C).

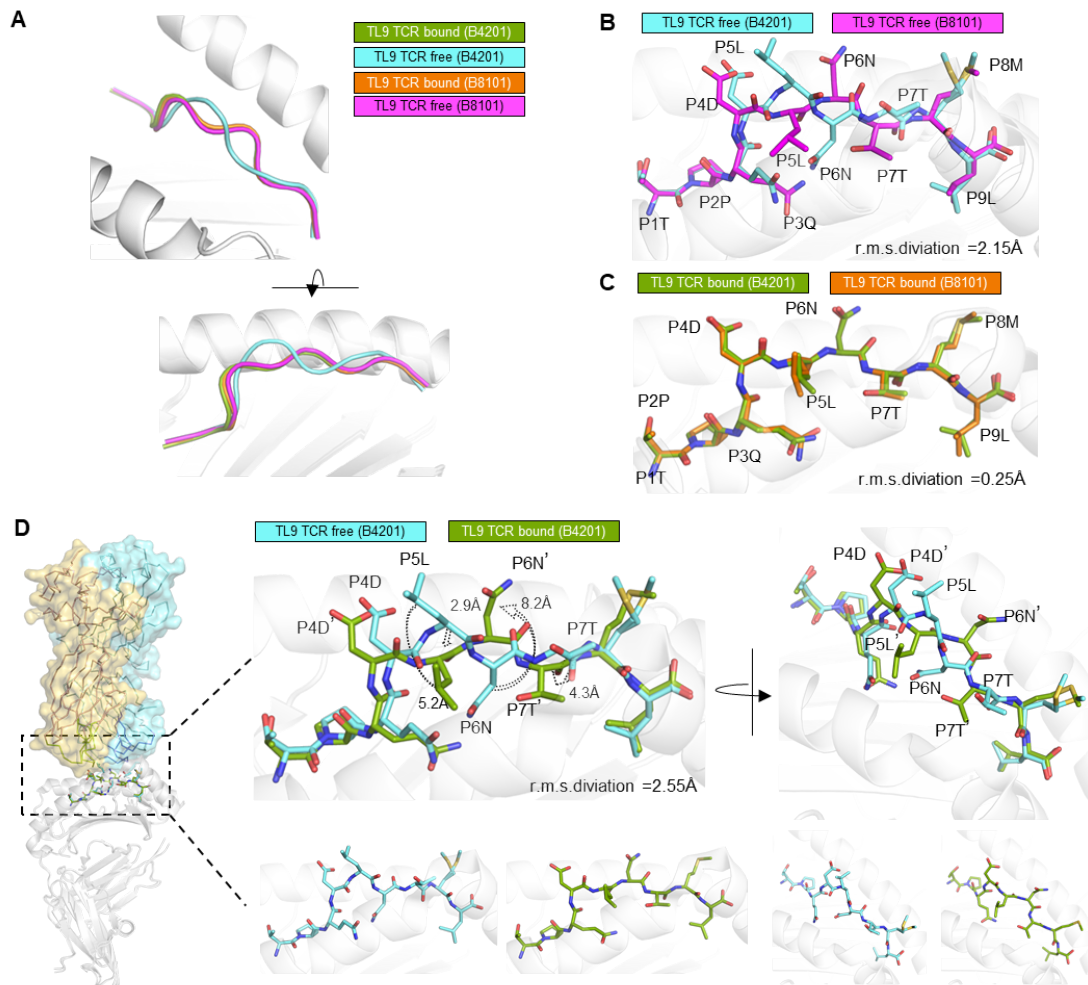

173

174 **Figure 2. In the context of B4201, T18A recognize the TPQDLNTML peptide very distinctly by**

175 **inducing a shifting of peptide register and return the TL9 peptide to its B8101 conformation. (A)**

176 The register change of TL9 peptide seems due to TCR binding make its conformation closer to its

177 B8101 register. (B) HIV Gag-TL9 epitope exhibits distinct conformations when presented by B8101

178 versus B4201 (PDB: 4U1I,4U1J(Kløverpris et al., 2015a)). (C) TL9 peptide adapts similar

179 conformation after TCR binding when presented by B8101 and B4201. (D) The diagram of TCR-

180 binding-induced TL9 register shift in the B4201 restriction. The side chain and backbone of P5L is

181 pressed into the bind groove for about 5 Å, the solvent exposed P7T is also press to the bind groove

182 for 4.3 Å. The buried residue P6N shifts upwards by 8.2 Å and contact to the CDR2β of T18A.

183 The online version of this article includes the following source data for figure 2:

184 **FigureS1.** Comparison of free or TCR-bound TL9 peptide when presented by HLA-B\*81:01.

185

186 Under the B\*42:01 restriction, the electron density showed that the central part  
187 of TPQDLNTML had a 'conformational switch' compared to its conformation in the free  
188 pMHC (Fig.2D). The side chain of leucine at P5 (P5L) turned down with a movement of  
189 about 5.2 Å, and its peptide backbone was pressed toward the antigen-binding cleft.  
190 At the same time, anchor residue P6N was flipping by 112°, becoming solvent exposed  
191 and was involved in CDR2β interactions. On the contrary, solvent exposed P7T shifted  
192 towards the base of the groove by 4.3 Å and acted as a secondary anchor residue. The  
193 'molecular-switch' resulted in a less bulged conformation of TL9 peptide. From a  
194 structural perspective, TCR forced the side chain of the most exposed P5L and  
195 backbone of P4-P5 to embed towards the antigen-binding cleft, and popped out the  
196 asparagine up and out of the binding groove. Remarkably change in peptide  
197 configuration was reflected at r.m.s. deviation of 2.55 Å when the bound and free HLA-  
198 B\*42:01 TL9-binding domains were superimposed.

199 In contrast, the configuration of free TPQDLNTML and TCR-bound TPQDLNTML  
200 was almost identical under the B81 restriction (Fig.S1). Collectively, in the B42 context,  
201 TCR binding induced 'conformational switch' and made the backbone configuration  
202 much closer to, the conformation of TL9 peptide under B81 restriction (Fig.2A). The  
203 structural rearrangement of peptide occurred upon T18A binding resulted in closer p-  
204 MHC surface and similar adaptation of the TCR across B42 and B81 restriction, thus an  
205 'induced fit molecular mimicry'(Macdonald et al., 2009) might underpinned this cross-



206 restriction structurally.

207       It was intriguing to investigate how the prominent bulge of TL9 peptide in the free  
208 pMHC of the B42 context, was pressed into the antigen-binding groove upon TCR  
209 engagement. The superimpose of unbound and bound TL9/HLA-B4201 complexes  
210 (Fig.3A) confirmed that the clashes with CDR3 $\alpha$  loop drive the conformational switch  
211 of the peptide. Clashes on peptide involved the side chain of P4D and both backbone  
212 and side chain of P5L, which competed with Asn96 and Asn97 of CDR3 $\alpha$  of TCR. The  
213 most serious clashing occurred between the side chain of P5L and the side chain of  
214 Asn97, which both occupied the same volume. As TCR and peptide ligands both owned  
215 certain extent of plasticity, we wonder why it was peptide itself to adapt to TCR  
216 accommodation but not in reverse. A net of hydrogen bonds was observed in the  
217 bottom end of CDR3 $\alpha$  loop, which fixed the structure of CDR3 $\alpha$  backbone. Moreover,  
218 W149, K148, T145 and Y86 of HLA-B4201 formed a salt bridge and three hydrogen  
219 bonds with P9L and P8M at the TL9 C-terminus. The strong anchoring of C-terminal of  
220 the peptide limited the conformational switch in the middle of the peptide, rather than  
221 an extending of the peptide C-terminus. To conclude, both relative rigid CDR3 $\alpha$  loop  
222 and C-terminal anchoring induced the conformational switch of TL9 after T18A  
223 involving.



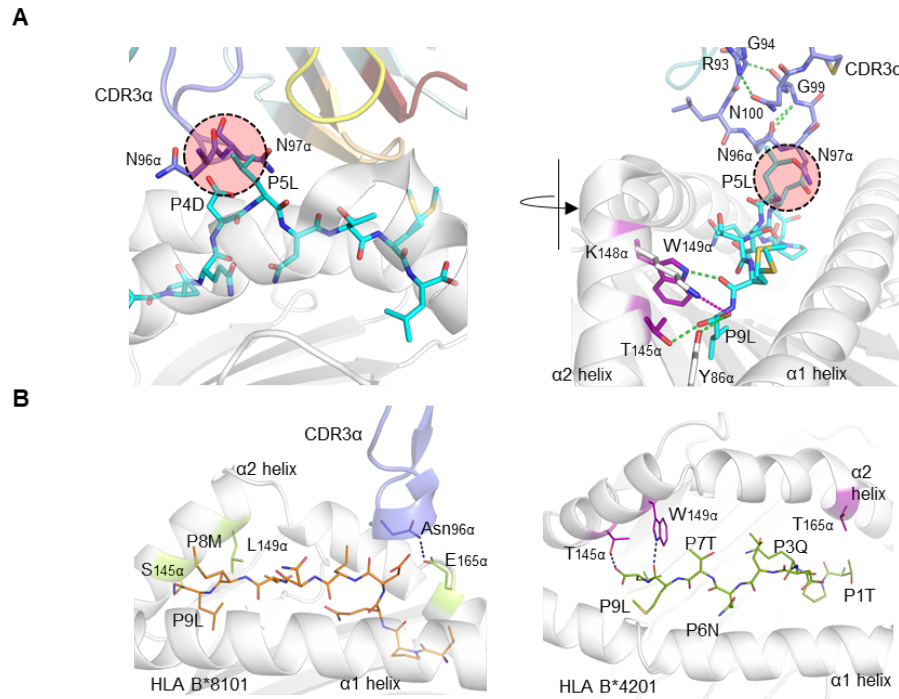

224

225 **Figure 3. Explanation of the induced-fit mechanism in TL9-B4201 recognition by T18A TCR. (A)**

226 Left panel: Steric clashes between peptide (cyan) N-terminal P4D, P5L and Asn96, Asn97 of CDR3α

227 (blue). Right panel: hydrogen bonds matrix increases CDR3α rigidity and drives the peptide to

228 adapt TCR accommodation, instead of TCR to adapt to peptide. And the anchoring of peptide C

229 terminus by W149α, K148α, T145α, and Y86α also contribute to conformational change in the

230 TPQDLNTML peptide upon TCR involving. (B) Illustration of the HLA-B polymorphism in the peptide

231 binding groove. Compare to S145α, L149α in B8101, T145α, W149α in B4201 anchor the C terminus

232 of peptide tighter than B8101 and contribute to conformation change of peptide register. The

233 green dashed lines represent hydrogen bonds and the purple dashed lines represent salt bridges.

234

235 In addition, we also compared the effect of HLA polymorphism on TCR binding in

236 the T18A TCR system. HLA-B\*81:01 and HLA-B\*42:01 are two popular alleles in the

237 African population, differ by 5 residues, of which 3 are located in the peptide-binding

238 groove and may contribute on the interaction (Fig.3B). Compared with L149 and S145  
239 of HLA-B\*81:01, W149 and T145 of HLA-B\*42:01 had stronger interactions with TL9  
240 peptide, which fixed the peptide C-terminus and contributed to the conformational  
241 adaptation of peptide upon T18A binding. However, E165 of HLA-B\*81:01 formed  
242 hydrogen bonds with Asn96 of T18A CDR3 $\alpha$ , contributed to a stronger TCR-MHC  
243 interaction than HLA-B\*42:01.

244

245 **A slightly twisting of T18A CDR loops enables adaptation to polymorphic MHC**  
246 **ligands**

247 Structures of T18A TCR with B8101-TL9 or B4201-TL9 were superimposed by MHC,  
248 although the configuration of TCR was almost similar, a small pivoting about 1 Å was  
249 observed mainly on CDR $\alpha$  loops but not CDR $\beta$  loops (Fig.4A-C). To investigate which  
250 factor will cause this twisting, CDR $\alpha$  residues and adjacent atoms were overlaid  
251 (Fig.4D), and the polymorphic residue E165 of B8101 and T165 of B4201 was  
252 coincidental in this region.

253 CDR3 $\alpha$  Loop spanned the antigen-binding cleft and contact with peptide and MHC  
254  $\alpha$ 2 helix (Fig.4E). It was noteworthy to mention that due to HLA polymorphisms (Fig.  
255 S4), Asn96 of CDR3 $\alpha$  interacted with E165 of HLA-B\*8101, but the side chain T165 of  
256 B\*4201 was shorter than E165 of B\*8101 with a distance about 5.2 Å so this H-bond  
257 was absent in B\*4201 context. It was Asn32 of CDR1 $\alpha$  formed hydrogen bond with  
258 A160 under the restriction of B\*4201, as a compensation. In B\*8101 context, Asn32 of  
259 CDR1 $\alpha$  was swinging towards the MHC  $\alpha$ 1 helix and forming H-bond with E165 via the

260 help of water molecule. Collectively, the slightly twisting of T18A docking on pMHC  
 261 surface was an adaptation to the HLA polymorphism between B8101 and B4201 and  
 262 contributed to cross-restriction.

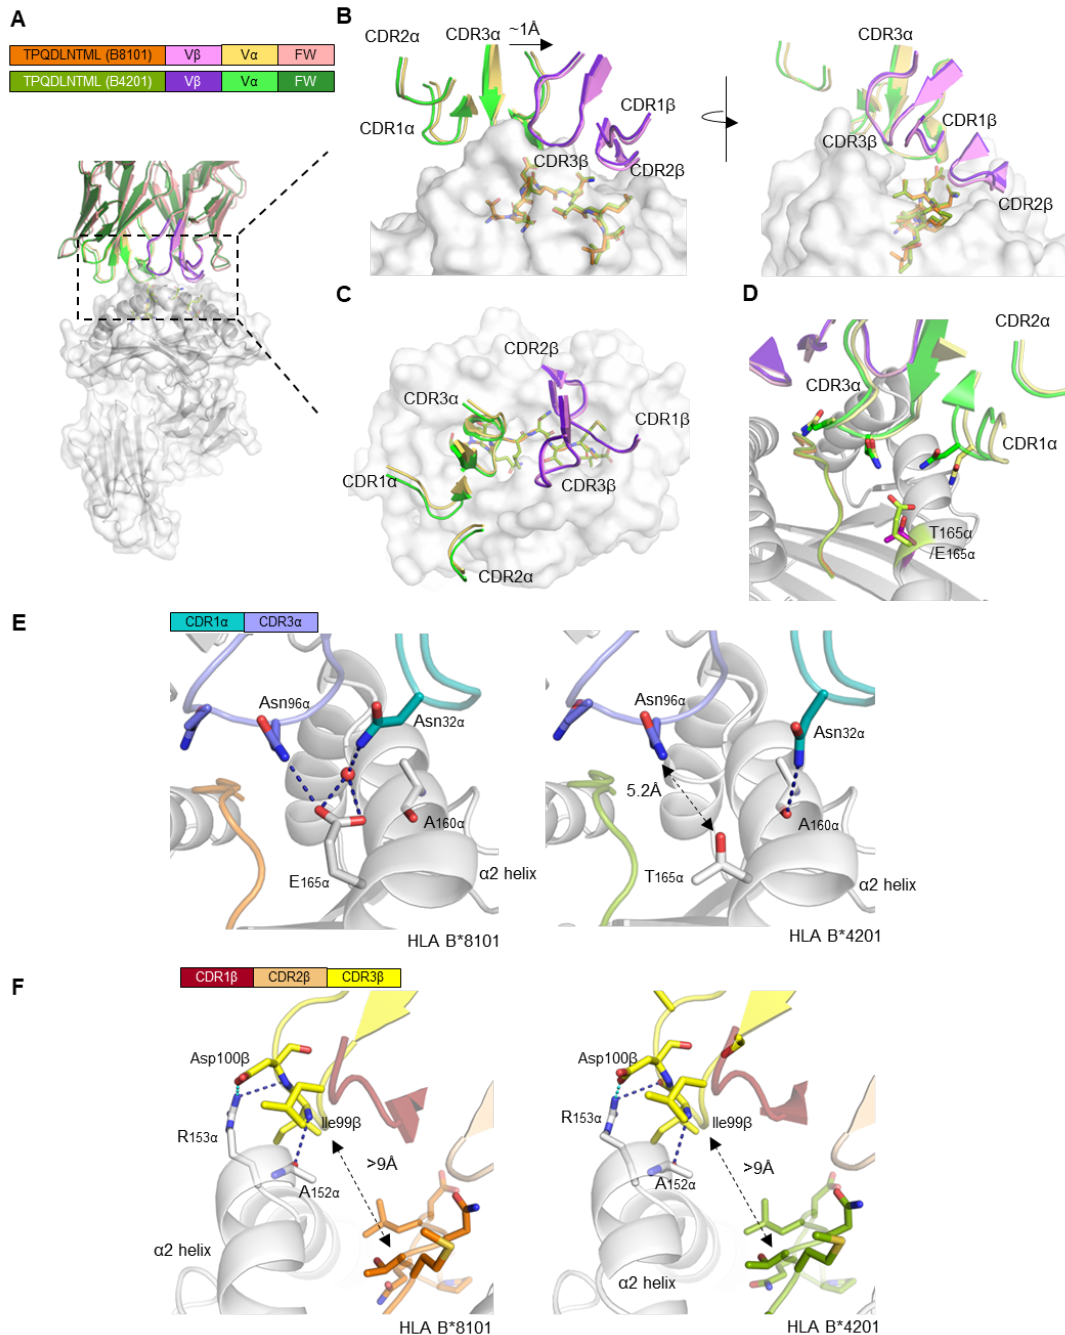

263  
 264 **Figure 4. T18A adopts similar docking on B8101-restricted TL9 and B4201-restricted TL9 but with**  
 265 **slightly TCR twisting due to MHC polymorphism.** (A). The overall view of overlapping of two  
 266 ternary structures. (B) When the pHLA domains in two structures are superimposed, the CDR

267 loops only differ by an RMSD of 0.32 Å. In the B8101 complex, the T18A TCR is positioned 1 Å closer  
268 to the peptide C terminus. CDR loops of TCR are represented in cartoon, and peptides are shown  
269 in stick. (C) The top view of CDR loops of T18A above B8101 and B42 01 molecules is shown. (D)  
270 Overlap of the polymorphic region E165α/T165α and the nearby CDR3α and CDR1α loops. (E) MHC  
271 polymorphism results in different interactions with TCR CDR3α and CDR1α loops and contributes  
272 to the swinging away of CDR1α in B4201 background. (F) CDR3β loops forms 1 salt bridge and 2  
273 hydrogen bonds to HLA α2 helix in both structures, and is far away from the TL9 peptide. The deep  
274 blue dashed lines represent hydrogen bonds and the cyan dashed lines represent salt bridges.

275 The online version of this article includes the following source data for figure 4:

276 **Figure S3.** Detailed interactions of T18A CDR loops to MHC ligands.

277 **Figure S4.** Comparison of the electrostatically colored surface of TL9-HLA-B8101 or -B4201 in  
278 complex with T18A binding.

279

280 In both complexes, CDR3β loops were located above the α2 helix of the HLA  
281 protein, and were far away from the peptide side chains with the distance about 9 Å,  
282 on average (Fig.4F, Fig.S3). The CDR3β formed salt bridges between Asp100 and R153  
283 of the HLA molecule, while Ile99 formed hydrogen bonds with R153 and A152 of the  
284 α2 helix. CDR3β of T18A formed strong contact with the bulge of MHC α2 helix and  
285 was one of the main contributors of the TCR-pMHC interaction, but indeed with no  
286 interactions towards the peptide, which was unexpected and intriguing.

287

288 **Broken of the traditional Jα connection to Vα in the T18A TCR extend its ability to**

289 **bind different MHC molecules**

290 Another surprising finding was that the traditional  $J\alpha$ - $V\alpha$  connection was broken in  
291 T18A at both B8101 and B4201 ternary structures. The core of the traditional TCR  $V\alpha$   
292 domain consists of two beta-sheets, typical in V domains of the immunoglobulin family  
293 (Fig. 5B). Unlike common "closed"  $V\alpha$  cores, in T18A, the disruption of the  $\beta$  strand  
294 made the core of  $V\alpha$  domain more "open" (Figure 5A). The lower part of the  $J\alpha$ - $V\alpha$   
295 interaction was destroyed, and three hydrogen bonds were broken near the conserved  
296 FGXG motif, but still preserved the interaction between the upper part of the chain.  
297 Moreover, the hydrogen bond between G99-G94 and N100-R93 fixed the lower  
298 portion of the CDR3 $\alpha$  loop which might compensate for the broken of three hydrogen  
299 bonds. Such interruptions had been observed in mouse T cell responses, such as the  
300 "closed" conformation of the Yae62 TCR's  $V\alpha$  bound to MHC I and the "open"  
301 conformation when bound to MHC II. In all of the "open" structures, the upper  
302 interaction between  $J\alpha$  and  $V\alpha$  strands was intact, but they were separated at the  
303 second glycine of the FGXG motif in a similar pattern, although different TRAV  
304 sequences were used. Conformational changes in the  $V\alpha$  core made it possible for the  
305 same TCR to cross-recognize multiple distinct MHCs (Fig. 5C).

306 The direct consequence of this conformational change was to enlarge the distance  
307 between  $J\alpha$  and  $V\alpha$ , which finally led to the perturbation of the  $V\alpha$  domain including  
308 CDR1 and CDR2 loops, which swang away from the  $V\beta$  domain (Fig. 5D). We  
309 superimposed T18A (TRAV26-1/ TRBV12-3) and 1E6 TCR (TRAV12-3/TRBV12-4) to  
310 compare the effect of "opened" or "closed"  $J\alpha$ - $V\alpha$  interactions on the entire TCR

311 configuration. When  $V\beta$  domains were overlapped, the breaking of the hydrogen bond  
 312 between  $J\alpha$  and  $V\alpha$  mainly affected the relative position of the  $V\alpha$  domain to  $V\beta$ ,  
 313 causing the  $V\alpha$  CDR1 and CDR2 rings to rotate by  $15\text{-}20^\circ$  relative to  $V\beta$  (Fig. 5E). The  
 314 opening or closing of  $J\alpha$ - $V\alpha$  strands above the CDR3 loop altered the relative positions  
 315 of  $V\alpha$  and  $V\beta$  CDR1 and CDR2 loops for more than  $7\text{ \AA}$  -  $9\text{ \AA}$ .

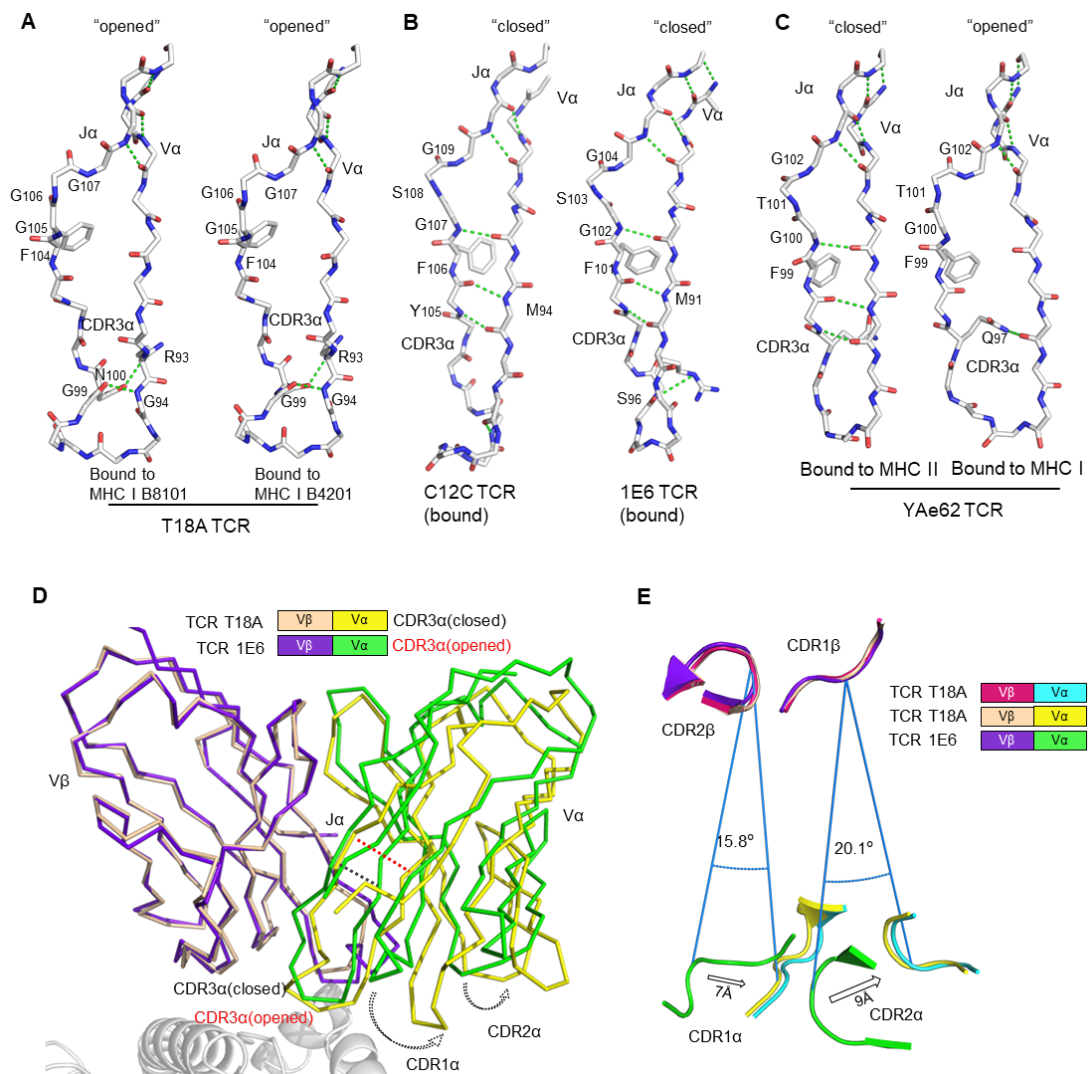

316

317 **Figure 5. The uncommon "opened" T18A CDR3α alters the relative orientation of  $V\alpha$  to  $V\beta$ .** (A)

318 The "opened" conformation of the  $\beta$  sheet interactions between  $V\alpha$  and  $J\alpha$  of T18A when it is

319 bound to B8101-pTL9 versus B4201-pTL9. A stick representation of the protein backbone and the

320 side chains of the FGXG conserved motif are shown. Backbone H-bonds, as well as H-bond with

321 R93, are shown in green. (B) The “closed” conformation of V $\alpha$ -J $\alpha$  interactions of C12C(Ladell et al.,  
322 2013) and 1E6(Coles et al., 2020) TCR, representing traditional CDR3 $\alpha$  conformation in most of  
323 TCR-pMHC profiles. (C) The disruption of V $\alpha$ -J $\alpha$  H bonds of YAE62(Yin et al., 2011) when it is bound  
324 to MHC II versus MHC I, indicating the alteration of CDR3 $\alpha$  could expand the ability of the TCR to  
325 adapt Different MHC Ligands. (D) The V $\alpha$  and V $\beta$  domains of T18A and 1E6 TCR are overlaid by V $\beta$   
326 as similar TRBV gene is used. (E) A view looking down through the TCR is shown. Relative position  
327 of CDR $\alpha$  loops to CDR $\beta$  loops are changed due to “opened” or “closed” CDR3 $\alpha$ . The relative  
328 distance and angle of movement is indicated.

329

330 The “opened” conformation of the T18A TCR V $\alpha$  core region supported a  
331 hypothesis proposed by Yin et al(Dai et al., 2008; Yin et al., 2011). They suggested that  
332 a given TCR can switch between at least three alternative conformations, depending  
333 on whether V $\alpha$ J $\alpha$  or V $\beta$ J $\beta$  connections were disrupted. This hypothesis highlighted  
334 another kind of TCR plasticity, which was differed from traditional CDR residue  
335 rotamers or conformational alteration on CDR loop backbones. As Yin et al. proposed  
336 their ideas based on a cross-restriction event of mouse YAE62 TCR with MHC class I  
337 and MHC class II, the disruptions of J $\alpha$ -V $\alpha$  connection in cross-reactive T18A provided  
338 first clinical evidence in human natural antiviral response. This also suggested that  
339 switching between alternative conformations may be partially responsible for the  
340 alloreactivity of TCRs. Collectively, the “open” or “closed” state of V $\alpha$  or V $\beta$  core region  
341 allowed TCR to maintain the conserved interaction with MHC meanwhile expand the  
342 TCR repertoire, by enlarging or minimizing the relative distance between the V $\alpha$  and



343 V $\beta$  domains, to adapt the different MHC components with various helical spacing and  
344 sequence.

345

346 **Unusual TCR CDR3 $\beta$  docking on MHC component underpins tolerance to peptide**  
347 **diversity**

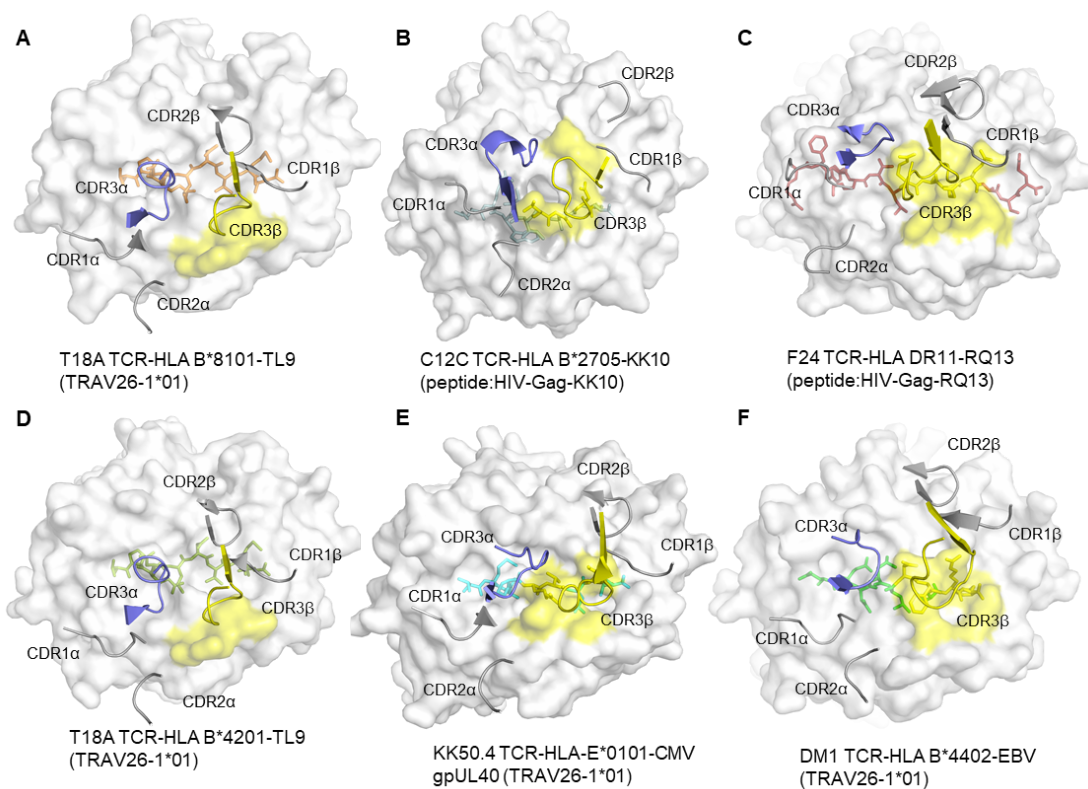

348

349 **Figure 6. The rare docking mode of T18A CDR3 $\beta$  on  $\alpha$ 2 helix of the MHC but not the peptide. (A-**  
350 **F). The foot print of TCR CDR3 $\beta$  on pMHC complexes are colored in yellow from 6 different**  
351 **recognition profiles. Panels b-c represent the molecular mechanism of two TCR C12C and**  
352 **F24(Galperin et al., 2018) which are also involved in HIV immune responses; and e-f represent TCR**  
353 **KK50.4(Hoare et al., 2006) and DM1(Archbold et al., 2009) using similar TRAV segment as T18A**  
354 **TCR. Unlike other 4 structures, CDR3 $\beta$  of T18A recognize MHC residues instead of peptide residues;**  
355 **and the C terminal of TL9 is recognized by CDR2 $\beta$  loops. Comparison to 129 TCR-p-MHC PDB**



356 profiles confirm that the CDR3 $\beta$  docking mode of T18A is unique. Peptide in each panel is shown  
357 in stick, CDR loops are shown in cartoon, and MHCs are shown in surface view.

358 The online version of this article includes the following source data for figure 6:

359 **Figure S2.** Comparison of TCR docking between T18A and C12C reveals the leaning towards HLA  
360  $\alpha$ 2 helix of T18A TCR.

361

362 Generally, T cell receptors display high diversities in CDR3 regions to contact varied  
363 antigen peptides while less diversified CDR1 and CDR2 loops mainly contact the less  
364 varied MHC molecules. In the docking of T18A TCR toward B8101 or B4201, however,  
365 CDR3 $\beta$  formed few contacts to the peptide but focused on the  $\alpha$ 2 helix of MHC. This  
366 rare docking pattern was different from other cases (Fig.6A-F, Fig. S2). Firstly, in other  
367 TCR-p-MHC complexes, CDR3 $\beta$  directly contacted the peptide, but such interactions  
368 were seldom observed in T18A-TL9-B8101 and T18A-TL9-B4201 complexes. Secondly,  
369 the swinging away of CDR3 $\beta$  let the CDR2 $\beta$  interact with the C-terminal of peptide, and  
370 the CDR2 $\beta$ , CDR3 $\alpha$  mediated interaction with peptide was suggested to be less  
371 variable than classical CDR3 $\beta$ , CDR3 $\alpha$  mediated interactions, which will constraint the  
372 conformation of the peptide. Collectively, the unusual CDR3 $\beta$  docking of T18A on MHC  
373 component, but not the peptide, enabled the CDR3 $\beta$  to avoid the distinct  
374 conformation of TL9 peptide presented by B8101 and B4201 allele, which might  
375 contribute to the cross-reactive property of T18A.

376 We examined reported TCR-pMHC ternary structures from IEDB/3Dstructure  
377 database(Ehrenmann et al., 2009; Ehrenmann and Lefranc, 2011; Kaas et al., 2004;

378 Lefranc et al., 2009) and PDB database(Burley et al., 2021), to obtain whether this  
379 CDR3 $\beta$  docking may have been present but not analyzed in the published data. We  
380 checked more than 260 published mouse and human TCR structures, involving 129  
381 different TCRs (Table S4). In all of these, CDR3 $\beta$  interacts with peptide and MHC ligands,  
382 most mainly focused on the peptide. However, CDR3 $\beta$  of T18A was unique, which was  
383 far away from the peptide but formed rigidly interaction with MHC ligand. This  
384 remarkably rare characteristic of T18A extended its tolerance to mutated peptides and  
385 might be related to the delayed viral escape in the clinic.

386 The 'opened' or 'closed' state of the J $\alpha$ -V $\alpha$  or J $\beta$ -V $\beta$  connection was also  
387 superimposed separately in 129 different TCRs. In most of these, the  $\beta$  strand near the  
388 conserved FGXG motif had the conventional 'closed' position, but 14 TCRs had the  
389 'opened' J $\alpha$ -V $\alpha$  connection (PDB 1MI5, 5D2N, 6AVF, 4GG6 et.al)(Broughton et al., 2012;  
390 Chan et al., 2018; Kjer-nielsen et al., 2003; Yang et al., 2015) and only one (PDB  
391 1KJ2)(Reiser et al., 2002) had the 'opened' J $\beta$ -V $\beta$  connection. This unexpected result  
392 was not explored in these published structures, indicating the 'opened' or 'closed'  
393 CDR3 $\alpha$  or CDR3 $\beta$  loops offer alternate conformations for the TCR structures and may  
394 extend the size of repertoire of a given TCR.

395

### 396 **High-affinity T18A TCRs bind to TL9 or TL9 escape variants under B8101 or B4201** 397 **restriction**

398 Functional analysis and biophysical methods were then used to explore whether  
399 escape mutations on the Gag TL9 epitope and different HLA presentations affect the

400 affinity of T18A TCR. The binding capacity of T18A TCR to different p-MHC molecules  
401 were measured by *in vitro* surface plasmon resonance (SPR). The results showed that  
402 T18A could recognize the TL9 peptide presented by B\*81:01 with a high affinity  
403 ( $K_d \approx 4.7 \mu\text{M}$ ), and could effectively recognize some escape variants of TL9, such as 3s-  
404 TL9 and 7s-TL9 (Fig.7A). Similarly, T18A was able to recognize TL9 peptides presented  
405 by B\*42:01 with moderate affinity ( $K_d \approx 46.1 \mu\text{M}$ ), as well as some escape variants of  
406 TL9, further supported the dual-reactivity of TCR T18A. Through the native-PAGE  
407 assays, distinct migrations were observed of the complexes formed by T18A and  
408 B8101-TL9, B4201-TL9, B8101-3sTL9, and B8101-7sTL9 on the gel (Fig.S5), which  
409 verified the results of the affinity measurement, that is, T18A had a high affinity against  
410 TL9 epitope of different restriction and mutations, suggesting the protective effect of  
411 this TCR in HLA-B\*81:01 population.

412

413

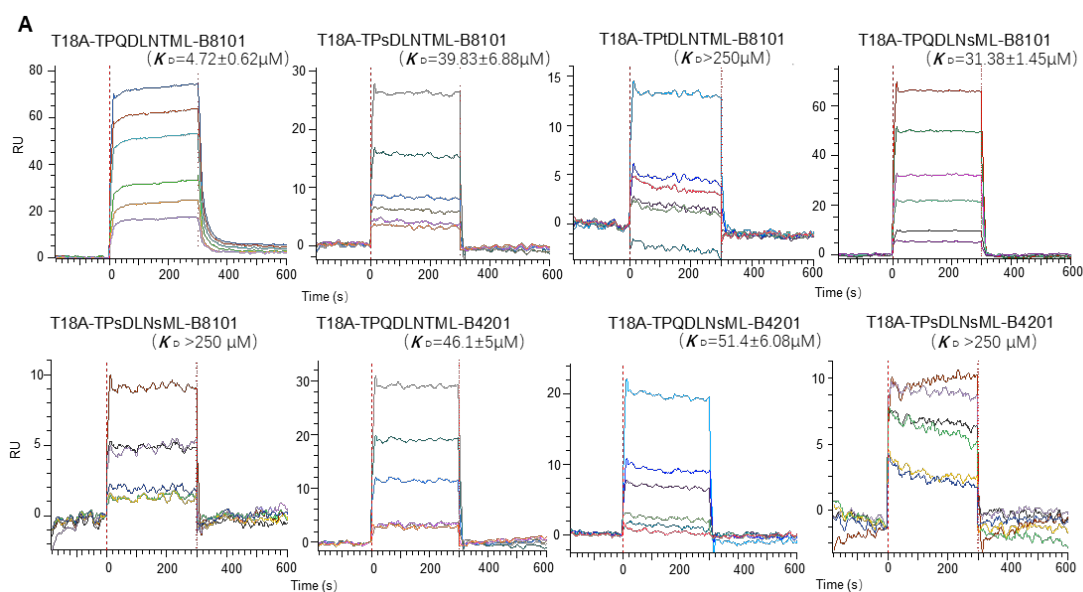

414

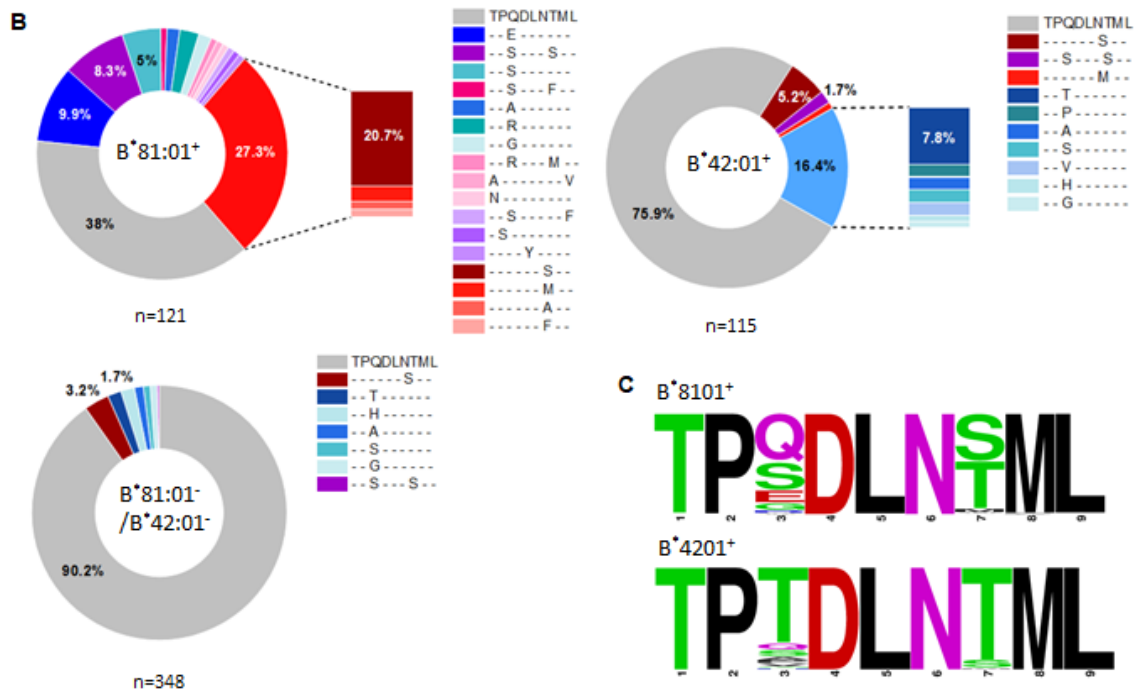

415

416 **Figure 7. The affinity measurement by SPR and differential escape patterns in TL9 epitope under**

417 **B8101 and B4201 context.** (A) SPR binding data for T18A TCR recognition of the wildtype (WT) and

418 popular mutated TL9 presented by B8101 and B4201. KD values range from 4.7  $\mu$ M for the WT TL9

419 peptide to >250  $\mu$ M for the TPQDLNsML peptide (see also Table 1, Fig. S6). (B) HLA-associated

420 variation in TL9-Gag in B8101-positive, B4201-positive, and B8101/B4201-negative HIV infected

421 patients. (C) Different escape modes in TL9 epitope is illustrated as Sequence Logo, demonstrating

422 TL9 mutation in B8101 background is located at position 3 and 7, while in B4201 background is

423 located at position 3.

424 The online version of this article includes the following source data for figure 7:

425 **Figure S5.** Native-PAGE confirms the dual-reactivity of TCR T18A.

426 **Figure S6.** Binding curves determined by SPR for mono-reactive TCRs and TL9 mutants.

427 **Figure S7.** Mutation characteristics of Gag TL9 epitope of HIV-1 in African population.

428 **Table S3.** HLA-associated variation in TL9-Gag from studies in last decade.

429

430 Besides, obvious differences were established for the capacity of escape mutants  
 431 of TL9 epitope between mono-reactive TCR and dual-reactive TCR (Table 1, Fig.S6).  
 432 Although the B\*81:01-derived, mono-reactive T11A also had a strong affinity for wild-  
 433 type TL9 (Kd≈4.9μM), its ability to bind mutated TL9 was weaker than that of T18A,  
 434 such that only one significant binding is confirmed against TL9 mutants. On the other  
 435 hand, B\*42:01-derived, mono-reactive TCR T7A showed no obvious response to either  
 436 wild-type or mutated TL9, as also evidenced by the native-PAGE results (Fig.S5). Since  
 437 the dominant TRBV12-3\*01 was used in all three TCRs mentioned above, and T18A  
 438 CDR3α dominated peptide interactions but not CDR3β, we speculated that the VDJ  
 439 rearrangement of the TCRα chain played a key role on the capacity of TL9 escape  
 440 mutants. Finally, the direct binding assays confirmed that dual-reactive TCR T18A had  
 441 functional superiority on binding the immunodominant epitope TL9, effectively adopt  
 442 many escape mutants, and possibly exerting greater selection pressure than mono-  
 443 reactive TCRs.

| TCR T18A    | B42-        |            |           |            |             |            |            |       |             |
|-------------|-------------|------------|-----------|------------|-------------|------------|------------|-------|-------------|
|             | B81-TL9     | B81-3sTL9  | B81-3tTL9 | B81-7sTL9  | B81-3s7sTL9 | B42-TL9    | B42-7sTL9  | 3tTL9 | B42-3s7sTL9 |
| <b>Kd</b>   | 4.72±0.62   | 39.83±6.88 | >250      | 31.38±1.45 | >250        | 46.1±5     | 51.4±6.08  | >250  | >250        |
| <b>kon</b>  | 9.64±1.21   | 10.83±1.82 | ND        | 5.68±0.25  | ND          | 5.14±0.54  | 5.37±0.70  | ND    | ND          |
| <b>koff</b> | 0.045±0.002 | 0.43±0.016 | ND        | 0.18±0.002 | ND          | 0.24±0.005 | 0.28±0.007 | ND    | ND          |
| TCR T11A    | B81-TL9     | B81-3sTL9  | B81-3tTL9 | B81-7sTL9  | B81-3s7sTL9 |            |            |       |             |
| <b>Kd</b>   | 4.94±0.41   | >250       | >250      | 24.14±2.46 | >250        |            |            |       |             |
| <b>kon</b>  | 13±1.30     | ND         | ND        | 8.33±0.81  | ND          |            |            |       |             |
| <b>koff</b> | 0.064±0.001 | ND         | ND        | 0.20±0.005 | ND          |            |            |       |             |

444 **Table 1. Measurement of TCR-pMHC affinity.** The data of B8101-derived, dual-reactive TCR T18A  
 445 (up panel) and B8101-derived, mono-reactive TCR T11A (lower panel) against HLA presented WT  
 446 TL9 or mutant TL9 are listed. Kdeq is in uM; kon is in  $M^{-1} s^{-1} \times 10^4$ ; koff is in  $s^{-1}$ ; ND, not determined;

447 NR, no obvious responses. The error representatives the SD of triplicate experiments ( $n \geq 3$ ).

448

#### 449 **HIV-1's different adaptation at TL9 epitope in patients of various HLA contexts**

450 The differences in CD8+ T cell-mediate immunity may also influence the evolution of  
451 the TL9 epitope itself. We collected the sequencing files of >3000 HIV-1 C-clade  
452 infected patients(Currier et al., 2006; Dorrell et al., 2001, 1999; Frater et al., 2007;  
453 Geldmacher et al., 2009b; Kloverpris et al., 2012; Kløverpris et al., 2016, 2015a, 2015b;  
454 Leslie et al., 2006a; Ntale et al., 2012; Payne et al., 2014) and dissected the HLA-driven  
455 differential selection pressure (Fig.7B, Fig.S7, and table S3). The TL9 epitope of HIV-1  
456 had a significantly higher proportion of mutations in HLA B\*81:01 or HLA B\*42:01  
457 cohorts than in individuals without any of two alleles ( $p < 0.001$ , t-test). It was  
458 confirmed that the TL9 epitope did run different mutation patterns across the two HLA  
459 populations.

460 In the context of HLA-B\*81:01, the TL9 epitope mutations were mainly located at  
461 position 3 or 7 of the peptide, and the most preferred mutations were 3s-TL9 and 7s-  
462 TL9 (Fig7C), respectively. Under the background of HLA B\*42:01, the mutations in the  
463 TL9 epitope focus on position 3, and the most preferred mutation was 3t-TL9. The  
464 affinity measurement showed that mutations on these two sites of TL9 peptide could  
465 significantly reduce the affinity of TCR to pMHC molecule. Structural evidence showed  
466 that these two sites in the T18A TCR system were oriented toward the antigen-binding  
467 cleft regardless of the HLA restriction, and position 3 worked as a secondary anchored  
468 residue (Fig.2C). This suggested that the decreased capability of T18A TCR to the

469 mutant epitopes may mainly due to the decreased binding affinity of HLA molecule to  
470 TL9 variants. The occurrence of different HLA-specific adaptation patterns at TL9  
471 epitope and significant differences in the affinity of TCRs indicated the qualitatively  
472 unique CTL responses induced by closely related HLA in anti-viral immunity.

473

## 474 **DISCUSSION**

475 A population of dual-reactive T cells associated with lower plasma viral load following  
476 HIV-1 infection is identified by Brockman and Ndhlovu et.al(Ogunshola et al., 2018),  
477 but why these TCRs can be cross-reactive with distinct alleles and how it could help to  
478 defend chronic infections remain a mystery. Our work found essential characteristics  
479 associated with alloreactivity, which might illustrate the mechanism underpinning this  
480 biological event. Firstly, the CDR3 $\beta$  of T18A surprisingly focusing on recognizing the  $\alpha$ 2  
481 helix of the HLA molecule but not the peptide, which is distinct to most known TCR  
482 recognition patterns. This unique usage of CDR3 $\beta$  helps the alloreactive TCR to ignore  
483 the conformational difference of the peptide, in this case, which is caused by HLA  
484 polymorphism between B8101 and B4201. Secondly, the uncommon 'opened' state of  
485 J $\alpha$ -V $\alpha$  connection changes the relative orientation of V $\alpha$  to V $\beta$ , which expands the  
486 TCR's adaptation ability with various MHC alleles. Thirdly, the rigidity of T18A also  
487 contributes to the alloreactivity. The rigidity is performed in at least three aspects: one  
488 is the H-bond net in CDR3 $\alpha$  makes it more relative steady than the peptide ligand;  
489 another is the usage of CDR2 $\beta$  instead of CDR3 $\beta$  increases the rigidity of TCR towards  
490 the peptide, and the third is the short CDR3 length of T18A restrict the flexibility of

491 CDR3 loops. The rigidity of T18A TCR leads to the TL9 peptide adapts its plastic  
492 conformation to TCR docking but not in reverse.

493 Another intriguing question is why the dual-reactive T cells are correlated with  
494 better control against HIV-1 infection, instead of the mono-reactive T cells. This could  
495 be explained by viral escaping on the immune-dominant TL9 epitope. Our results had  
496 revealed that the TL9 peptide is flexible in the antigen-binding cleft, so besides  
497 attenuating epitope presentations, mutations on the TL9 could possibly challenge the  
498 effective TCR recognition by changing residues facing the TCRs. Considering TL9  
499 peptide exposed distinct residues to T cells with B8101 or B4201, thus it is a great  
500 challenge for mono-reactive T cells to cope with diversified interaction surfaces. Thus  
501 the escape mutations on the TL9 epitope might sometimes change the peptide  
502 conformation and escape the pre-existing effective T cells. However, this escape  
503 strategy could be blocked by cross-reactive T cells.

504 From a structural perspective, the absence of CDR3 $\beta$  in interactions toward  
505 peptides and intensive interactions of CDR3 $\beta$  toward MHC make the dual-reactive TCR  
506 T18A less specific but more versatile. Polymorphic alleles B8101 and B4201 do  
507 influence the conformation of the peptide, but T18A TCR overcome this challenge.  
508 Unique CDR loop usage enables T18A to tolerate different initial conformations of the  
509 TL9 epitope, and SFR assays confirm that the affinity of dual-reactive T18A TCR for TL9-  
510 HLA, especially for mutated epitopes, was stronger than that of single-reactive TCR  
511 T11A and T7A. Besides defining antigen-specificity, the affinity of TCR to pHLA is  
512 directly correlated to the toxicity and proliferative capacity of TCR-transduced T cells,



513 which further explains the clinical benefit of the presence of dual-reactive T cells.

514 Of note, the polymorphism at position 165 of MHC  $\alpha 2$  helix (glutamic acid in  
515 B8101 but threonine in B4201) explains why the affinity of T18A against B8101-TL9 is  
516 higher than that of T18A against B4201-TL9, as H-bond is formed only between 165E  
517 and CDR3 $\alpha$ . A stronger CD8+T immune response therefore produces greater selection  
518 pressure for HIV-1 in the B\*81:01 population. Interestingly, HIV-1 sequence analysis  
519 based on >2000 individuals showed that the mutation frequency of TL9 epitope in the  
520 B\*81:01 expressing individuals was significantly higher than that in the B\*42:01  
521 expressing individuals and the cohort without the above two alleles. Combined  
522 together, the differential mutation pattern of HIV-1 in different HLA contexts  
523 demonstrates how the interaction of disease-specific TCR shapes the adaptation of HIV  
524 for mutations to counterstrike the immunity.

525 However, there remains insufficient evidence to reveal to what extent the viral  
526 evolution is shaped by the human immune system. Reasonable speculation is that this  
527 effect is more evident in RNA viruses because the high mutation rates in virus  
528 replication provide more options for the evolution of escape variants(Singh et al.,  
529 2017). Another key point is that most of the immune-selective mutations might occur  
530 on the epitopes upon the T cell-mediated immunity. Based on the molecular arm race  
531 between CD8+ T cells and HIV-1 within the epitope TL9, the influence of host acquired  
532 immunity in genomic mutations of the virus, therefore, might be underestimated,  
533 especially for those RNA viruses that are globally prevalent, such as HIV, influenza, and  
534 SARS-CoV-2.

535 Collectively, our findings indicated the unique usage of CDR3 $\beta$  strengthens the  
536 peptide tolerance of T18A, and thus increasing the capability of TL9 escape variants.  
537 These features are consistent with the better control of viral replication and delayed  
538 viral escape in B8101 individuals. Supported by these clinical and structural evidence,  
539 the dual-reactive phenotype of CD8+ T cells might be good biomarkers for viral control  
540 and with great clinical significance for immunotherapy.

541

## 542 **MATERIAL AND METHODS**

### 543 **Peptides**

544 The HIV Gag p24 TL9 peptide (TPQDLNTML180-188), the escape variant Q182S, Q182T,  
545 T186S, and Q182S/T186S TL9 peptide were synthesized at > 95% purity, were  
546 synthesized at GL Biochem corporation and confirmed by high-performance liquid  
547 chromatography.

### 548 **TCR and HLA Protein expression, refolding and purification**

549 The B\*81:01/B\*42:01 dual-reactive T18A TCR, mono-reactive B\*42:01-restricted T7A  
550 TCR, and mono-reactive B\*81:01-restricted T11A TCR were bacterially expressed as  
551 previously described(Cole et al., 2008, 2006; Hellman et al., 2016). The soluble HLA-  
552 B\*81:01-TL9, HLA-B\*42:01-TL9 and HLA-TL9-variants forms were also produced from  
553 bacterially expressed inclusion bodies. In brief, the  $\alpha$ - and  $\beta$ -chains of TCR, the heavy  
554 chain and  $\beta$ 2m of HLA were expressed separately as inclusion bodies in a BL21  
555 Escherichia coli strain. The inclusion bodies were washed three times and resuspended  
556 in 8M urea, then mixed into a cold refolding buffer. For TCR refolding, 1:1 ratio of  $\alpha$

557 and  $\beta$  chains were diluted into 50 mM Tris (pH 8.3), 2 mM EDTA, 2.5 M urea, 0.5mM  
558 oxidized glutathione, and 5mM reduced glutathione. For pMHC refolding, 1:1 ratio of  
559 HLA-B\*81:01 or B\*42:01 heavy chain and  $\beta$ 2m were mixed into 100mM Tris-HCL (pH  
560 8.3), 2mM EDTA, 400mM L-arginine-HCl, 0.5mM oxidized glutathione, and 5mM  
561 reduced glutathione. Peptides were dissolved in DMSO and injected into the refolding  
562 buffer of five molar excess folds. TCR and pMHC complexes were incubated in refolding  
563 buffer for 74 h and 48h at 4 °C, respectively. TCR and pMHC proteins were dialyzed and  
564 further purified via anion exchange chromatography (HiTrap Q HP; Mono Q; GE  
565 Healthcare) and size-exclusion (Superdex 200; GE Healthcare) as describe  
566 previously(Petersen et al., 2014; Pieper et al., 2018). The purified protein was buffer-  
567 exchanged to 10 mM Tris-HCl, pH 8.0 and concentrated to 10 mg/ml for crystallization.

#### 568 **Crystallization and diffraction data collection**

569 Protein crystals of TCR-pMHC complexes were grown at 20°C using the sitting-drop  
570 vapor diffusion technique. The T18A in complex with HLA B\*81:01 and Gag TL9 peptide  
571 was crystallized in the presence of 0.2 M Potassium chloride, 0.05 M HEPES, 35% v/v  
572 Pentaerythritol propoxylate (5/4 PO/OH), pH 7.5 while the T18A in complex with HLA  
573 B\*42:01 and Gag TL9 was crystallized in the buffer of 0.1 M SPG, 25 % w/v PEG 1500,  
574 pH 7.0. For cryoprotection, protein crystals were soaked in 20% glycerol/80% mother  
575 liquor for 15s and frozen into liquid nitrogen. Data were collected at the BL19U1  
576 beamline at the Shanghai Synchrotron Radiation Facility and process with HKL2000.  
577 The structures were solved by molecular replacement method using PHENIX.phaser  
578 and refined by PHENIX.refine program. Manual refinement was running in Coot. The

579 visualization of structures was performed in PyMol and the data was deposited in the  
580 Protein Data Bank with PDB ID 7DZN, 7DZM.

### 581 **Surface plasmon resonance**

582 The SPR assays were performed as described previously (Blevins and Baker, 2017; Kurt  
583 H. Piepenbrink, Brian E. Gloor, Kathryn M. Armstrong, 2009; Riley et al., 2018). Briefly,  
584 the protein was buffer exchanged into PBS and biotinylated for 1h at room  
585 temperature. The T18A TCR was fixed on the streptavidin-coated flow-cell surface of a  
586 SA sensor chip and the pMHC complexes were used as analyte. Injected pMHC proteins  
587 spanned concentration ranges of 0.5–250  $\mu$  M, and the equilibrium affinities were  
588 measured in 10mM HEPES, pH 7.4, 500mM NaCl, 1%BSA, and 0.02%TWEEN20 at 25°C  
589 on the Octet QKe system (ForteBio). The Kd was determined by the fitting of a single-  
590 ligand binding model.

### 591 **Analysis on sequence of HIV-1 Gag TL9 epitope from subject studies**

592 To clearly define the HLA-B\*81:01 an B\*42:01-mediated differential HIV-1 epitope  
593 evolution, we collected the viral sequencing profiles from published subject studies  
594 restricted to Gag TL9 epitope since 2007 to present. More than 20 literatures were  
595 obtained. Due different scope of statistics from various studies, however, we  
596 summarized all the data and divided it into two categories: a) A total of 584 HIV-1  
597 infected individuals with clearly identified mutant residues at TL9 epitope. b). All data  
598 was combined together, a total of 3092 HIV-1 infected persons, but with less  
599 information about the mutated residue of TL9. The data was analyzed and visualize in  
600 figure 7, table S3, and figure S7.

601

602 **ACKNOWLEDGMENTS**

603 We thank the staff of the Shanghai Synchrotron Radiation Facility (beamline BL19U1).

604 We sincerely pay tribute to the people who have strived in the forefront of fighting

605 against the HIV-1 pandemic and who studied this virus around the world.

606

607 **DECLARATIONS**

608 **Funding:** This work was supported by the National Natural Science Foundation of

609 China (31870728 and 31470738).

610 **Competing interests:** The authors declare no conflict of interest.

611 **Availability of data and material:** The atomic coordinates and structure details

612 reported in this work have been deposited in the Protein Data Bank, [www.pdb.org](http://www.pdb.org)

613 (PDB ID codes 7DZM and 7DZN).

614 **Code availability:** Not applicable.

615 **Author contributions:** Y.L. conducted the protein expression, purification, and

616 crystallization. D.S did the SPR assays. L.Y. and Y.L. contributed to the study design. Y.L.

617 and D.S contributed to data analysis. Y.L. wrote the manuscript and all authors

618 contributed to revisions.

619 **Ethics approval:** Not applicable. No patients are involved in this study. The clinical data

620 are cited and summarized from published papers.

621 **Consent to participate:** Not applicable.

622 **Consent for publication:** All authors agree with the submission of this manuscript,

623 and the material is original research and has not been previously reported and is not  
624 under consideration for publication elsewhere.

625

## 626 REFERENCE

- 627 Archbold JK, Macdonald WA, Gras S, Ely LK, Miles JJ, Bell MJ, Brennan RM, Beddoe T, Wilce MCJ,  
628 Clements CS, Purcell AW, McCluskey J, Burrows SR, Rossjohn J. 2009. Natural  
629 micropolymorphism in human leukocyte antigens provides a basis for genetic control of antigen  
630 recognition. *J Exp Med* **206**:209–219. doi:10.1084/jem.20082136
- 631 Blevins SJ, Baker BM. 2017. Using global analysis to extend the accuracy and precision of binding  
632 measurements with T cell receptors and their peptide/MHC ligands. *Front Mol Biosci* **4**:1–9.  
633 doi:10.3389/fmolb.2017.00002
- 634 Broughton SE, Petersen J, Theodossis A, Scally SW, Loh KL, Thompson A, van Bergen J, Kooy-Winkelaar  
635 Y, Henderson KN, Beddoe T, Tye-Din JA, Mannering SI, Purcell AW, McCluskey J, Anderson RP,  
636 Koning F, Reid HH, Rossjohn J. 2012. Biased T Cell Receptor Usage Directed against Human  
637 Leukocyte Antigen DQ8-Restricted Gliadin Peptides Is Associated with Celiac Disease. *Immunity*  
638 **37**:611–621. doi:10.1016/j.immuni.2012.07.013
- 639 Burley SK, Bhikadiya C, Bi C, Bittrich S, Chen L, Crichlow G V., Christie CH, Dalenberg K, Di Costanzo L,  
640 Duarte JM, Dutta S, Feng Z, Ganesan S, Goodsell DS, Ghosh S, Green RK, Guranovic V, Guzenko  
641 D, Hudson BP, Lawson CL, Liang Y, Lowe R, Namkoong H, Peisach E, Persikova I, Randle C, Rose  
642 A, Rose Y, Sali A, Segura J, Sekharan M, Shao C, Tao YP, Voigt M, Westbrook JD, Young JY,  
643 Zardecki C, Zhuravleva M. 2021. RCSB Protein Data Bank: Powerful new tools for exploring 3D  
644 structures of biological macromolecules for basic and applied research and education in

- 645 fundamental biology, biomedicine, biotechnology, bioengineering and energy sciences. *Nucleic*  
646 *Acids Res* **49**:D437–D451. doi:10.1093/nar/gkaa1038
- 647 Carlson JM, Listgarten J, Pfeifer N, Tan V, Kadie C, Walker BD, Ndung'u T, Shapiro R, Frater J, Brumme  
648 ZL, Goulder PJR, Heckerman D. 2012. Widespread Impact of HLA Restriction on Immune Control  
649 and Escape Pathways of HIV-1. *J Virol* **86**:5230–5243. doi:10.1128/jvi.06728-11
- 650 Chan KF, Gully BS, Gras S, Beringer DX, Kjer-Nielsen L, Cebon J, McCluskey J, Chen W, Rossjohn J.  
651 2018. Divergent T-cell receptor recognition modes of a HLA-I restricted extended tumour-  
652 associated peptide. *Nat Commun* **9**. doi:10.1038/s41467-018-03321-w
- 653 Cole DK, Dunn SM, Sami M, Boulter JM, Jakobsen BK, Sewell AK. 2008. T cell receptor engagement of  
654 peptide-major histocompatibility complex class I does not modify CD8 binding. *Mol Immunol*  
655 **45**:2700–2709. doi:10.1016/j.molimm.2007.12.009
- 656 Cole DK, Rizkallah PJ, Gao F, Watson NI, Boulter JM, Bell JI, Sami M, Gao GF, Jakobsen BK. 2006.  
657 Crystal structure of HLA-A\*2402 complexed with a telomerase peptide. *Eur J Immunol* **36**:170–  
658 179. doi:10.1002/eji.200535424
- 659 Coles CH, Mulvaney RM, Malla S, Walker A, Smith KJ, Lloyd A, Lowe KL, McCully ML, Martinez Hague  
660 R, Aleksic M, Harper J, Paston SJ, Donnellan Z, Chester F, Wiederhold K, Robinson RA, Knox A,  
661 Stacey AR, Dukes J, Baston E, Griffin S, Jakobsen BK, Vuidepot A, Harper S. 2020. TCRs with  
662 Distinct Specificity Profiles Use Different Binding Modes to Engage an Identical Peptide–HLA  
663 Complex. *J Immunol* **204**:1943–1953. doi:10.4049/jimmunol.1900915
- 664 Colf LA, Bankovich AJ, Hanick NA, Bowerman NA, Jones LL, Kranz DMM, Garcia KC. 2007. How a Single  
665 T Cell Receptor Recognizes Both Self and Foreign MHC. *Cell* **129**:135–146.  
666 doi:10.1016/j.cell.2007.01.048

- 667 Currier JR, Viswapoka U, Tovanabutra S, Mason CJ, Bix DL, McCutchan FE, Cox JH. 2006. CTL epitope  
668 distribution patterns in the Gag and Nef proteins of HIV-1 from subtype A infected subjects in  
669 Kenya: Use of multiple peptide sets increases the detectable breadth of the CTL response. *BMC*  
670 *Immunol* **7**:1–17. doi:10.1186/1471-2172-7-8
- 671 Dai S, Huseby ES, Rubtsova K, Scott-Browne J, Crawford F, Macdonald WA, Marrack P, Kappler JW.  
672 2008. Crossreactive T Cells Spotlight the Germline Rules for  $\alpha\beta$  T Cell-Receptor Interactions with  
673 MHC Molecules. *Immunity* **28**:324–334. doi:10.1016/j.immuni.2008.01.008
- 674 Dorrell L, Dong T, Ogg GS, Lister S, McAdam S, Rostron T, Conlon C, McMichael AJ, Rowland-Jones SL.  
675 1999. Distinct Recognition of Non-Clade B Human Immunodeficiency Virus Type 1 Epitopes by  
676 Cytotoxic T Lymphocytes Generated from Donors Infected in Africa. *J Virol* **73**:1708–1714.  
677 doi:10.1128/jvi.73.2.1708-1714.1999
- 678 Dorrell L, Willcox BE, Yvonne Jones E, Gillespie G, Njai H, Sabally S, Jaye A, Degleria K, Rostron T, Lepin  
679 E, McMichael A, Whittle H, Rowland-Jones S. 2001. Cytotoxic T lymphocytes recognize  
680 structurally diverse, clade-specific and cross-reactive peptides in human immunodeficiency virus  
681 type-1 gag through HLA-B53. *Eur J Immunol* **31**:1747–1756. doi:10.1002/1521-  
682 4141(200106)31:6<1747::AID-IMMU1747>3.0.CO;2-L
- 683 Doxiadis IIN, Smits JMA, Schreuder GMT, Persijn GG, Van Houwelingen HC, Van Rood JJ, Claas FHJ.  
684 1996. Association between specific HLA combinations and probability of kidney allograft loss:  
685 The taboo concept. *Lancet* **348**:850–853. doi:10.1016/S0140-6736(96)02296-9
- 686 Edwards BH, Bansal A, Sabbaj S, Bakari J, Mulligan MJ, Goepfert PA. 2002. Magnitude of Functional  
687 CD8 T-cell responded to the gag protein of HIV 1 correlates inversely with viral load in plasma. *J*  
688 *Virol* **76**:2298–2305. doi:10.1128/JVI.76.5.2298



- 689 Ehrenmann F, Kaas Q, Lefranc MP. 2009. IMGT/3dstructure-DB and IMGT/domaingalign: A  
690 database and a tool for immunoglobulins or antibodies, T cell receptors, MHC, IgSF and MHCsF.  
691 *Nucleic Acids Res* **38**:301–307. doi:10.1093/nar/gkp946
- 692 Ehrenmann F, Lefranc MP. 2011. Imgt/3Dstructure-DB: Querying the IMGT database for 3D structures  
693 in immunology and immunoinformatics (IG or antibodies, TR, MH, RPI, and FPIA). *Cold Spring*  
694 *Harb Protoc* **6**:750–761. doi:10.1101/pdb.prot5637
- 695 Felix NJ, Allen PM. 2007. Specificity of T-cell alloreactivity. *Nat Rev Immunol* **7**:942–953.  
696 doi:10.1038/nri2200
- 697 Frater AJ, Brown H, Oxenius A, Gunthard HF, Hirschel B, Robinson N, Leslie AJ, Payne R, Crawford H,  
698 Prendergast A, Brander C, Kiepiela P, Walker BD, Goulder PJR, McLean A, Phillips RE. 2007.  
699 Effective T-Cell Responses Select Human Immunodeficiency Virus Mutants and Slow Disease  
700 Progression. *J Virol* **81**:6742–6751. doi:10.1128/jvi.00022-07
- 701 Galperin M, Farenc C, Mukhopadhyay M, Jayasinghe D, Decroos A, Benati D, Tan LL, Ciacchi L, Reid  
702 HH, Rossjohn J, Chakrabarti LA, Gras S. 2018. CD4+ T cell-mediated HLA class II cross-restriction  
703 in HIV controllers. *Sci Immunol* **3**:1–13. doi:10.1126/sciimmunol.aat0687
- 704 Geldmacher C, Metzler IS, Tovanabutra S, Asher TE, Gostick E, Ambrozak DR, Petrovas C, Schuetz A,  
705 Ngwenyama N, Kijak G, Maboko L, Hoelscher M, McCutchan F, Price DA, Douek DC, Koup RA.  
706 2009a. Minor viral and host genetic polymorphisms can dramatically impact the biologic  
707 outcome of an epitope-specific CD8 T-cell response. *Blood* **114**:1553–1562. doi:10.1182/blood-  
708 2009-02-206193
- 709 Geldmacher C, Metzler IS, Tovanabutra S, Asher TE, Gostick E, Ambrozak DR, Petrovas C, Schuetz A,  
710 Ngwenyama N, Kijak G, Maboko L, Hoelscher M, McCutchan F, Price DA, Douek DC, Koup RA.

- 711 2009b. Minor viral and host genetic polymorphisms can dramatically impact the biologic  
712 outcome of an epitope-specific CD8 T-cell response. *Blood* **114**:1553–1562. doi:10.1182/blood-  
713 2009-02-206193
- 714 Hellman LM, Yin L, Wang Y, Blevins SJ, Riley TP, Belden OS, Spear TT, Nishimura MI, Stern LJ, Baker  
715 BM. 2016. Differential scanning fluorimetry based assessments of the thermal and kinetic  
716 stability of peptide-MHC complexes. *J Immunol Methods* **432**:95–101.  
717 doi:10.1016/j.jim.2016.02.016
- 718 Hoare HL, Sullivan LC, Pietra G, Clements CS, Lee EJ, Ely LK, Beddoe T, Falco M, Kjer-Nielsen L, Reid  
719 HH, McCluskey J, Moretta L, Rossjohn J, Brooks AG. 2006. Structural basis for a major  
720 histocompatibility complex class Ib-restricted T cell response. *Nat Immunol* **7**:256–264.  
721 doi:10.1038/ni1312
- 722 Jameson, S.C., Hogquist, K.A., and Bevan MJ. 1995. POSITIVE SELECTION OF THYMOCYTES. *Annu Rev*  
723 *Immunol* **13**:93–126. doi:10.1038/s41591-019-0351-4
- 724 K Fleischhauer, N A Kernan, R J O'Reilly, B Dupont SY. 1990. Bone marrow-allograft rejection by T  
725 lymphocytes recognizing a single amino acid difference in HLA-B44. *New English J Med*  
726 **323**:1120–1123.
- 727 Kaas Q, Ruiz M, Lefranc MP. 2004. IMGT/3Dstructure-DB and IMGT/StructuralQuery, a database and a  
728 tool for immunoglobulin, T cell receptor and MHC structural data. *Nucleic Acids Res* **32**:208–210.  
729 doi:10.1093/nar/gkh042
- 730 Kawase T, Morishima Y, Matsuo K, Kashiwase K, Inoko H, Saji H, Kato S, Juji T, Kodera Y, Sasazuki T.  
731 2007. High-risk HLA allele mismatch combinations responsible for severe acute graft-versus-  
732 host disease and implication for its molecular mechanism. *Blood* **110**:2235–2241.

- 733 doi:10.1182/blood-2007-02-072405
- 734 Kjer-nielsen L, Clements CS, Purcell AW, Brooks AG, Whisstock JC, Burrows SR, McCluskey J, Rossjohn  
735 J. 2003. A Structural Basis for the Selection of Dominant  $\alpha\beta$  T Cell Receptors in Antiviral  
736 Immunity. *Immunity* **18**:53–64.
- 737 Kløverpris HN, Cole DK, Fuller A, Carlson J, Beck K, Schauenburg AJ, Rizkallah PJ, Buus S, Sewell AK,  
738 Goulder P. 2015a. A molecular switch in immunodominant HIV-1-specific CD8 T-cell epitopes  
739 shapes differential HLA-restricted escape. *Retrovirology* **12**:1–11. doi:10.1186/s12977-015-  
740 0149-5
- 741 Kloverpris HN, Harndahl M, Leslie AJ, Carlson JM, Ismail N, van der Stok M, Huang K-HG, Chen F,  
742 Riddell L, Steyn D, Goedhals D, van Vuuren C, Frater J, Walker BD, Carrington M, Ndung'u T,  
743 Buus S, Goulder P. 2012. HIV Control through a Single Nucleotide on the HLA-B Locus. *J Virol*  
744 **86**:11493–11500. doi:10.1128/jvi.01020-12
- 745 Kløverpris HN, Leslie A, Goulder P. 2016. Role of HLA adaptation in HIV evolution. *Front Immunol* **6**.  
746 doi:10.3389/fimmu.2015.00665
- 747 Kløverpris HN, McGregor R, McLaren JE, Ladell K, Harndahl M, Stryhn A, Carlson JM, Koofhethile C,  
748 Gerritsen B, Keşmir C, Chen F, Riddell L, Luzzi G, Leslie A, Walker BD, Ndung'u T, Buus S, Price  
749 DA, Goulder PJ. 2015b. CD8 + TCR Bias and Immunodominance in HIV-1 Infection. *J Immunol*  
750 **194**:5329–5345. doi:10.4049/jimmunol.1400854
- 751 Kurt H. Piepenbrink, Brian E. Gloor, Kathryn M. Armstrong and BMB. 2009. Methods for quantifying  
752 T cell receptor binding affinities and thermodynamics. *Methods Enzym* **466**:359–381.  
753 doi:10.1016/S0076-6879(09)66015-8.Methods
- 754 L A Sherman SC. 1993. The molecular basis of allorecognition. *Annu Rev Immunol* **11**:385–402.

- 755 doi:10.26907/978-5-00130-204-9-2019-24
- 756 Ladell K, Hashimoto M, Iglesias MC, Wilmann PG, McLaren JE, Gras S, Chikata T, Kuse N, Fastenackels  
757 S, Gostick E, Bridgeman JS, Venturi V, Arkoub ZA, Agut H, van Bockel DJ, Almeida JR, Douek DC,  
758 Meyer L, Venet A, Takiguchi M, Rossjohn J, Price DA, Appay V. 2013. A Molecular Basis for the  
759 Control of Preimmune Escape Variants by HIV-Specific CD8+ T Cells. *Immunity* **38**:425–436.  
760 doi:10.1016/j.immuni.2012.11.021
- 761 Lefranc MP, Giudicelli V, Ginestoux C, Jabado-Michaloud J, Folch G, Bellahcene F, Wu Y, Gemrot E,  
762 Brochet X, Lane J, Regnier L, Ehrenmann F, Lefranc G, Duroux P. 2009. IMGT®, the international  
763 ImMunoGeneTics information system®. *Nucleic Acids Res* **37**:1006–1012.  
764 doi:10.1093/nar/gkn838
- 765 Lesk AM, Chothia C. 1987. Canonical structures for the hypervariable regions of Immunoglobulins. *J*  
766 *Mol Biol* **295**:979–995. doi:10.1006/jmbi.1999.3358
- 767 Leslie A, Price DA, Mkhize P, Bishop K, Rathod A, Day C, Crawford H, Honeyborne I, Asher TE, Luzzi G,  
768 Edwards A, Rosseau CM, Mullins JI, Tudor-Williams G, Novelli V, Brander C, Douek DC, Kiepiela  
769 P, Walker BD, Goulder PJR. 2006a. Differential Selection Pressure Exerted on HIV by CTL  
770 Targeting Identical Epitopes but Restricted by Distinct HLA Alleles from the Same HLA  
771 Supertype. *J Immunol* **177**:4699–4708. doi:10.4049/jimmunol.177.7.4699
- 772 Leslie A, Price DA, Mkhize P, Bishop K, Rathod A, Day C, Crawford H, Honeyborne I, Asher TE, Luzzi G,  
773 Edwards A, Rosseau CM, Mullins JI, Tudor-Williams G, Novelli V, Brander C, Douek DC, Kiepiela  
774 P, Walker BD, Goulder PJR. 2006b. Differential Selection Pressure Exerted on HIV by CTL  
775 Targeting Identical Epitopes but Restricted by Distinct HLA Alleles from the Same HLA  
776 Supertype. *J Immunol* **177**:4699–4708. doi:10.4049/jimmunol.177.7.4699

- 777 Macdonald WA, Chen Z, Gras S, Archbold JK, Tynan FE, Clements CS, Bharadwaj M, Kjer-Nielsen L,  
778 Saunders PM, Wilce MCJ, Crawford F, Stadinsky B, Jackson D, Brooks AG, Purcell AW, Kappler  
779 JW, Burrows SR, Rossjohn J, McCluskey J. 2009. T Cell Allorecognition via Molecular Mimicry.  
780 *Immunity* **31**:897–908. doi:10.1016/j.immuni.2009.09.025
- 781 Macdonald WA, Purcell AW, Mifsud NA, Ely LK, Williams DS, Chang L, Gorman JJ, Clements CS, Kjer-  
782 Nielsen L, Koelle DM, Burrows SR, Tait BD, Holdsworth R, Brooks AG, Lovrecz GO, Lu L, Rossjohn  
783 J, McCluskey J. 2003. A naturally selected dimorphism within the HLA-B44 supertype alters class  
784 I structure, peptide repertoire, and T cell recognition. *J Exp Med* **198**:679–691.  
785 doi:10.1084/jem.20030066
- 786 Mifsud NA, Purcell AW, Chen W, Holdsworth R, Tait BD, McCluskey J. 2008. Immunodominance  
787 hierarchies and gender bias in direct TCD8-cell alloreactivity. *Am J Transplant* **8**:121–132.  
788 doi:10.1111/j.1600-6143.2007.02044.x
- 789 Ntale RS, Chopera DR, Ngandu NK, Assis de Rosa D, Zembe L, Gamielien H, Mlotshwa M, Werner L,  
790 Woodman Z, Mlisana K, Abdool Karim S, Gray CM, Williamson C. 2012. Temporal Association of  
791 HLA-B\*81:01- and HLA-B\*39:10-Mediated HIV-1 p24 Sequence Evolution with Disease  
792 Progression. *J Virol* **86**:12013–12024. doi:10.1128/jvi.00539-12
- 793 Ogunshola F, Anmole G, Miller RL, Goering E, Nkosi T, Muema D, Mann J, Ismail N, Chopera D,  
794 Ndung'u T, Brockman MA, Ndhlovu ZM. 2018. Dual HLA B\*42 and B\*81-reactive T cell receptors  
795 recognize more diverse HIV-1 Gag escape variants. *Nat Commun* **9**. doi:10.1038/s41467-018-  
796 07209-7
- 797 Payne R, Muenchhoff M, Mann J, Roberts HE, Matthews P, Adland E, Hemenstal A, Huang KH,  
798 Brockman M, Brumme Z, Sinclair M, Miura T, Frater J, Essex M, Shapiro R, Walker BD, Ndung'u

- 799 T, McLean AR, Carlson JM, Goulder PJR. 2014. Impact of HLA-driven HIV adaptation on virulence  
800 in populations of high HIV seroprevalence. *Proc Natl Acad Sci U S A* **111**:E5393–E5400.  
801 doi:10.1073/pnas.1413339111
- 802 Petersen J, Montserrat V, Mujico JR, Loh KL, Beringer DX, Van Lummel M, Thompson A, Mearin ML,  
803 Schweizer J, Kooy-Winkelaar Y, Van Bergen J, Drijfhout JW, Kan WT, La Gruta NL, Anderson RP,  
804 Reid HH, Koning F, Rossjohn J. 2014. T-cell receptor recognition of HLA-DQ2-gliadin complexes  
805 associated with celiac disease. *Nat Struct Mol Biol* **21**:480–488. doi:10.1038/nsmb.2817
- 806 Pieper J, Dubnovitsky A, Gerstner C, James EA, Rieck M, Kozhukh G, Tandre K, Pellegrino S, Gebe JA,  
807 Rönnblom L, Sandalova T, Kwok WW, Klareskog L, Buckner JH, Achour A, Malmström V. 2018.  
808 Memory T cells specific to citrullinated  $\alpha$ -enolase are enriched in the rheumatic joint. *J*  
809 *Autoimmun* **92**:47–56. doi:10.1016/j.jaut.2018.04.004
- 810 R E BILLINGHAM, L BRENT PBM. 1953. Actively acquired tolerance of foreign cells. *Nature*.
- 811 R M Zinkernagel PCD. 1974a. Restriction of in vitro T cell-mediated cytotoxicity in lymphocytic  
812 choriomeningitis within a syngeneic or semiallogeneic system. *Nature* **248**:701–702.
- 813 R M Zinkernagel PCD. 1974b. Restriction of in vitro T cell-mediated cytotoxicity in lymphocytic  
814 choriomeningitis within a syngeneic or semiallogeneic system. *Nature*.
- 815 Reiser JB, Grégoire C, Darnault C, Mosser T, Guimezanes A, Schmitt-Verhulst AM, Fontecilla-Camps JC,  
816 Mazza G, Malissen B, Housset D. 2002. A T cell receptor CDR3 $\beta$  loop undergoes conformational  
817 changes of unprecedented magnitude upon binding to a peptide/MHC class I complex.  
818 *Immunity* **16**:345–354. doi:10.1016/S1074-7613(02)00288-1
- 819 Riley TP, Hellman LM, Gee MH, Mendoza JL, Alonso JA, Foley KC, Nishimura MI, Vander Kooi CW,  
820 Garcia KC, Baker BM. 2018. T cell receptor cross-reactivity expanded by dramatic peptide–MHC

- 821 adaptability. *Nat Chem Biol* **14**:934–942. doi:10.1038/s41589-018-0130-4
- 822 Rossjohn J, Gras S, Miles JJ, Turner SJ, Godfrey DI, McCluskey J. 2015. T cell antigen receptor
- 823 recognition of antigen-presenting molecules. *Annu Rev Immunol* **33**:169–200.
- 824 doi:10.1146/annurev-immunol-032414-112334
- 825 Singh NK, Riley TP, Baker SCB, Borrman T, Weng Z, Baker BM. 2017. Emerging Concepts in TCR
- 826 Specificity: Rationalizing and (Maybe) Predicting Outcomes. *J Immunol* **199**:2203–2213.
- 827 doi:10.4049/jimmunol.1700744
- 828 Yang X, Gao M, Chen G, Pierce BG, Lu J, Weng NP, Mariuzza RA. 2015. Structural basis for clonal
- 829 diversity of the public T cell response to a dominant human cytomegalovirus epitope. *J Biol*
- 830 *Chem* **290**:29106–29119. doi:10.1074/jbc.M115.691311
- 831 Yin L, Huseby E, Scott-Browne J, Rubtsova K, Pinilla C, Crawford F, Marrack P, Dai S, Kappler JW. 2011.
- 832 A single T cell receptor bound to major histocompatibility complex class I and class II
- 833 glycoproteins reveals switchable TCR conformers. *Immunity* **35**:23–33.
- 834 doi:10.1016/j.immuni.2011.04.017
- 835

## Supplementary Materials for

# Cross-reactive TCR with alloreactivity for immunodominant HIV-1 epitope

## Gag TL9 with enhanced control of viral infection in the clinic

Yang Liu, Dan San, Lei Yin

### **This PDF file includes:**

Figure S1. Comparison of free or TCR-bound TL9 peptide when presented by HLA-B\*81:01.

Figure S2. The bias location of T18A TCR towards MHC  $\alpha 2$  helix. This position of TCR drives the CDR3 $\beta$  loop swing away from the axis of antigen-binding cleft, and leaves less flexible CDR2 $\beta$  to contact with peptide C-terminus.

Figure S3. Comparison of CDR loops interactions between the cross-restriction structures.

Figure S4. The APBS electrostatics is shown by a surface view, and the polymorphic residue E165 for B\*81:01 versus T165 for B\*42:01 are highlighted.

Figure S5. Native-PAGE validates that the *E.coli*-expressed T18A TCR can cross-reactive to both B\*81:01-presented TL9 and B\*42:01-presented TL9. These assays also confirm WT and Q3S, Q3T and T7S TL9 cross-reactivity of the T18A.

Figure S6. TCR binding curves determined by SPR across different HLA-B molecules presenting WT and mutated TL9 epitope.

Figure S7. Analysis on HIV TL9 variation in African population with different HLA alleles from published literatures.

Table S1. Data collection and refinement statistics of TCR-peptide-HLA-B structures.

Table S2. The table provides a detailed account of contact residues between the T18A TCR and B\*8101-TL9 and B\*4201-TL9. It is important to understand the atomic basis of the HLA-TCR interaction.

Table S3. Different evolution patterns of CTL specific-TL9 epitope restricted by various HLA alleles.



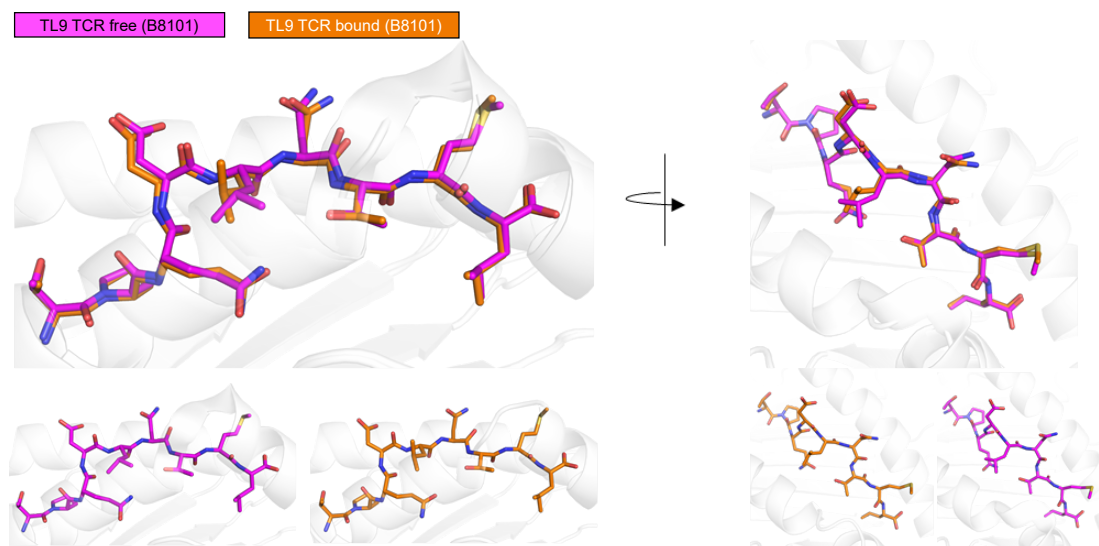

**Figure S1. T18A engagement does not change the conformation of TL9 peptide restricted by B8101.**  
(a) The structure of TL9 before TCR involvement is colored in magenta; The conformation of TL9 after TCR binding is colored in orange.

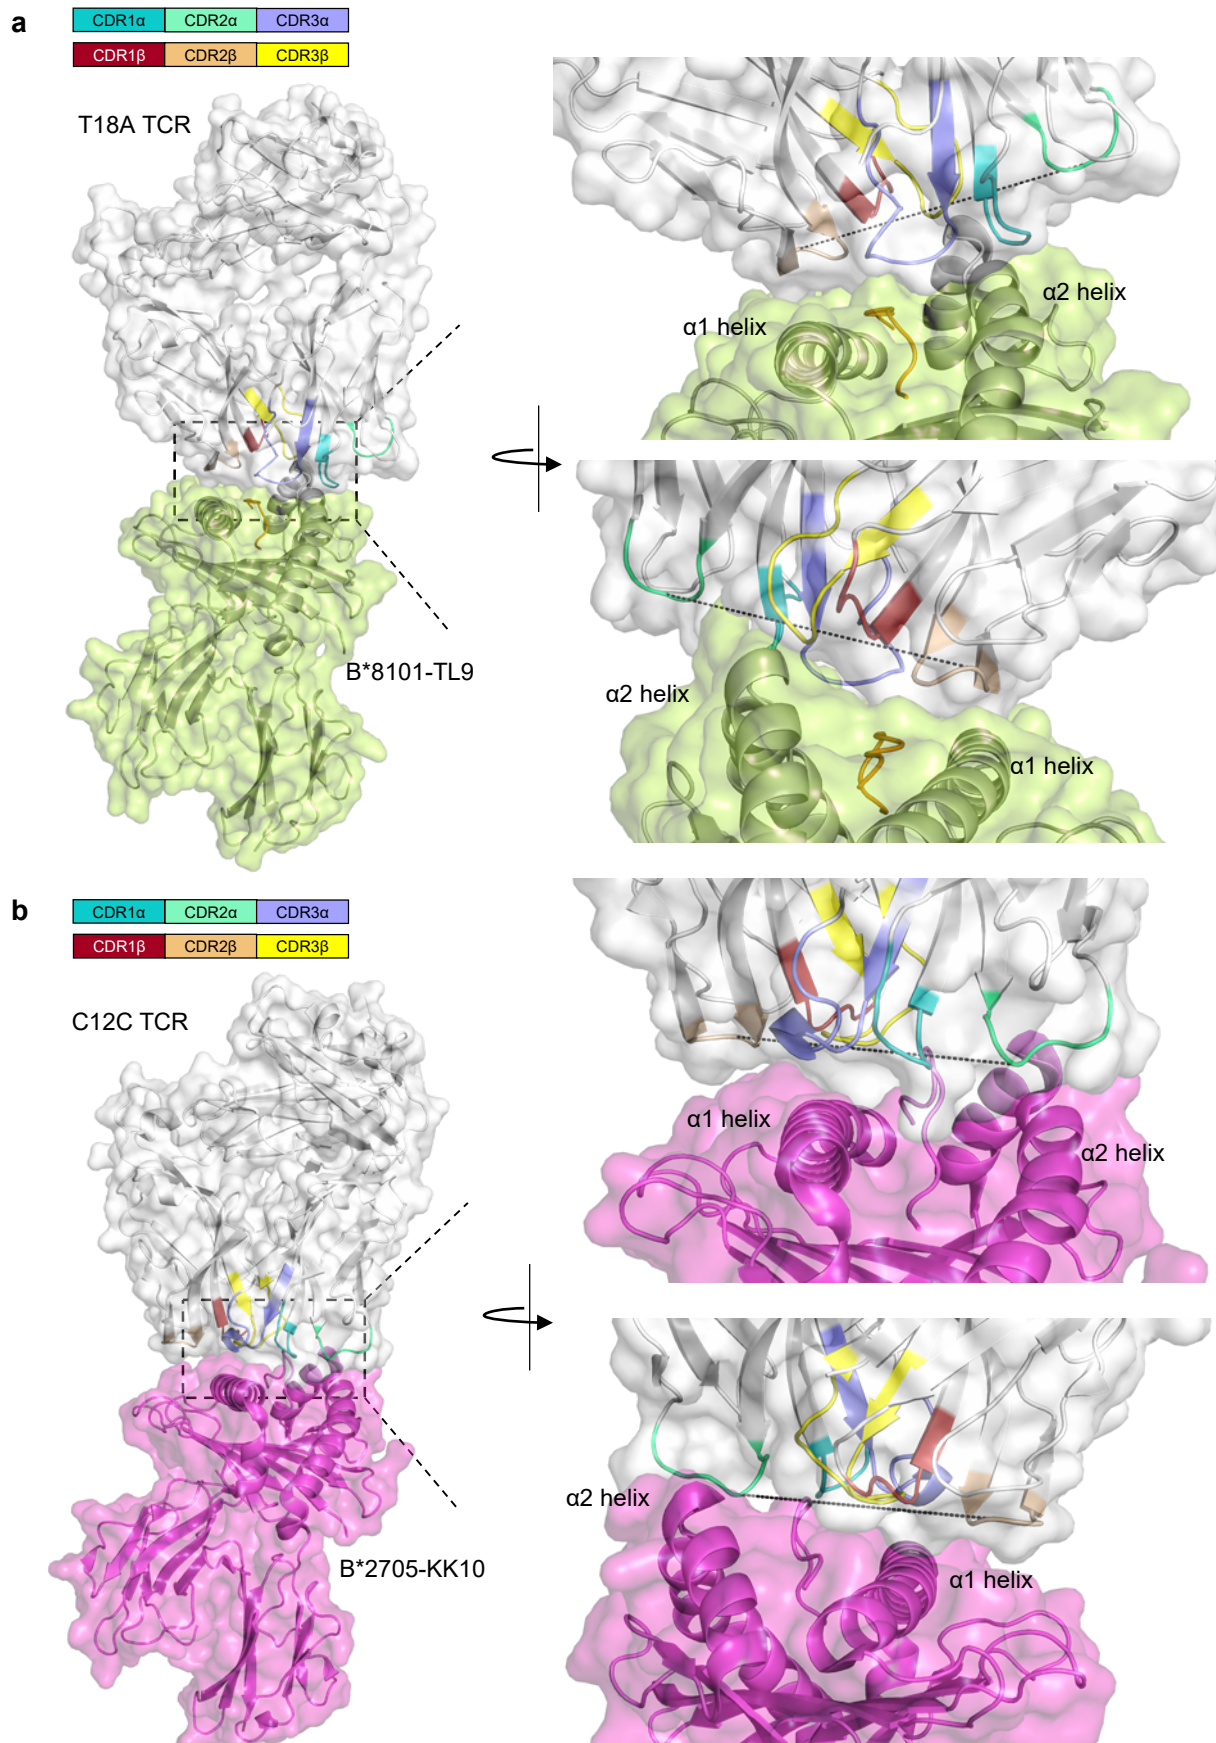

**Figure S2. Comparison of TCR docking between T18A and C12C reveals the leaning towards HLA  $\alpha$ 2 helix of T18A TCR.** (a). The surface view of T18A-B\*8101-TL9 recognition. T18A positions towards to the side of HLA  $\alpha$ 2 helix, and leaves CDR3 $\alpha$  and CDR2 $\beta$  to interact with peptide TL9.(b) The surface view of C12C-B\*2705-KK10 recognition. KK10 is a HIV p24 Gag derived epitope, and is immunodominant in HLA-B\*2705 individuals. In this recognition, TCR locates center of the antigen-binding cleft, enables the most variable CDR3 $\beta$  to interact with peptide.

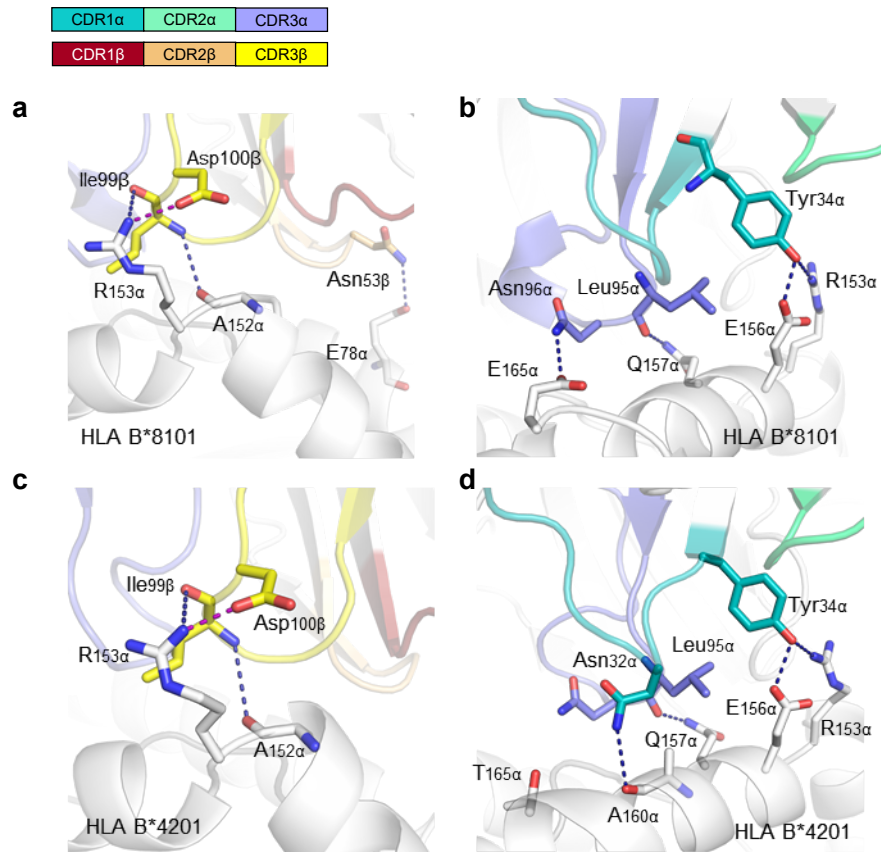

**Figure S3. Detailed interactions of T18A CDR loops to MHC ligands.** (a). Detailed view on CDR loops of the T18A  $\beta$  chain interact with the HLA-B8101. Hydrogen bonds and salt bridges are represented by blue or purple dashed lines, respectively. (b). T18A TCR  $\alpha$  chain interacts with B8101 ligand. (c). CDR  $\beta$  loops of the T18A TCR interact with the HLA-B4201. (d). CDR $\alpha$  loops of the T18A TCR interact with the HLA-B4201  $\alpha$ 2 helix.

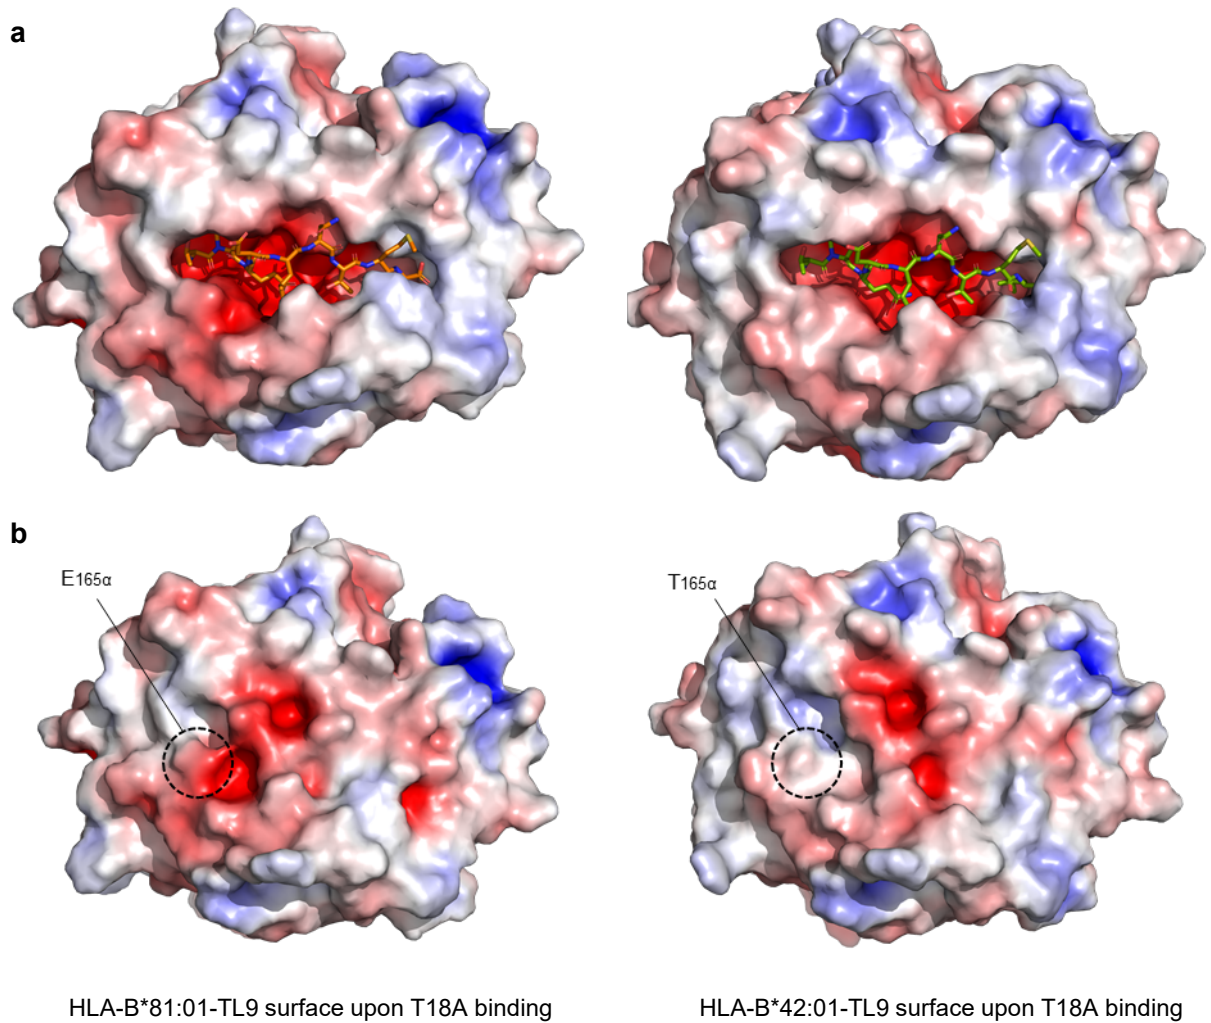

**Figure S4. Comparison of the electrostatically colored surface of TL9-HLA-B8101 or -B4201 in complex with T18A binding.** (a). TL9 in binding groove of the two structures. (b) Comparison illustrates the difference in characteristics of the TCR binding surface. The key polymorphic residue was highlighted in dashed circle. Red indicates the negatively charged and blue represents positively charged residues.



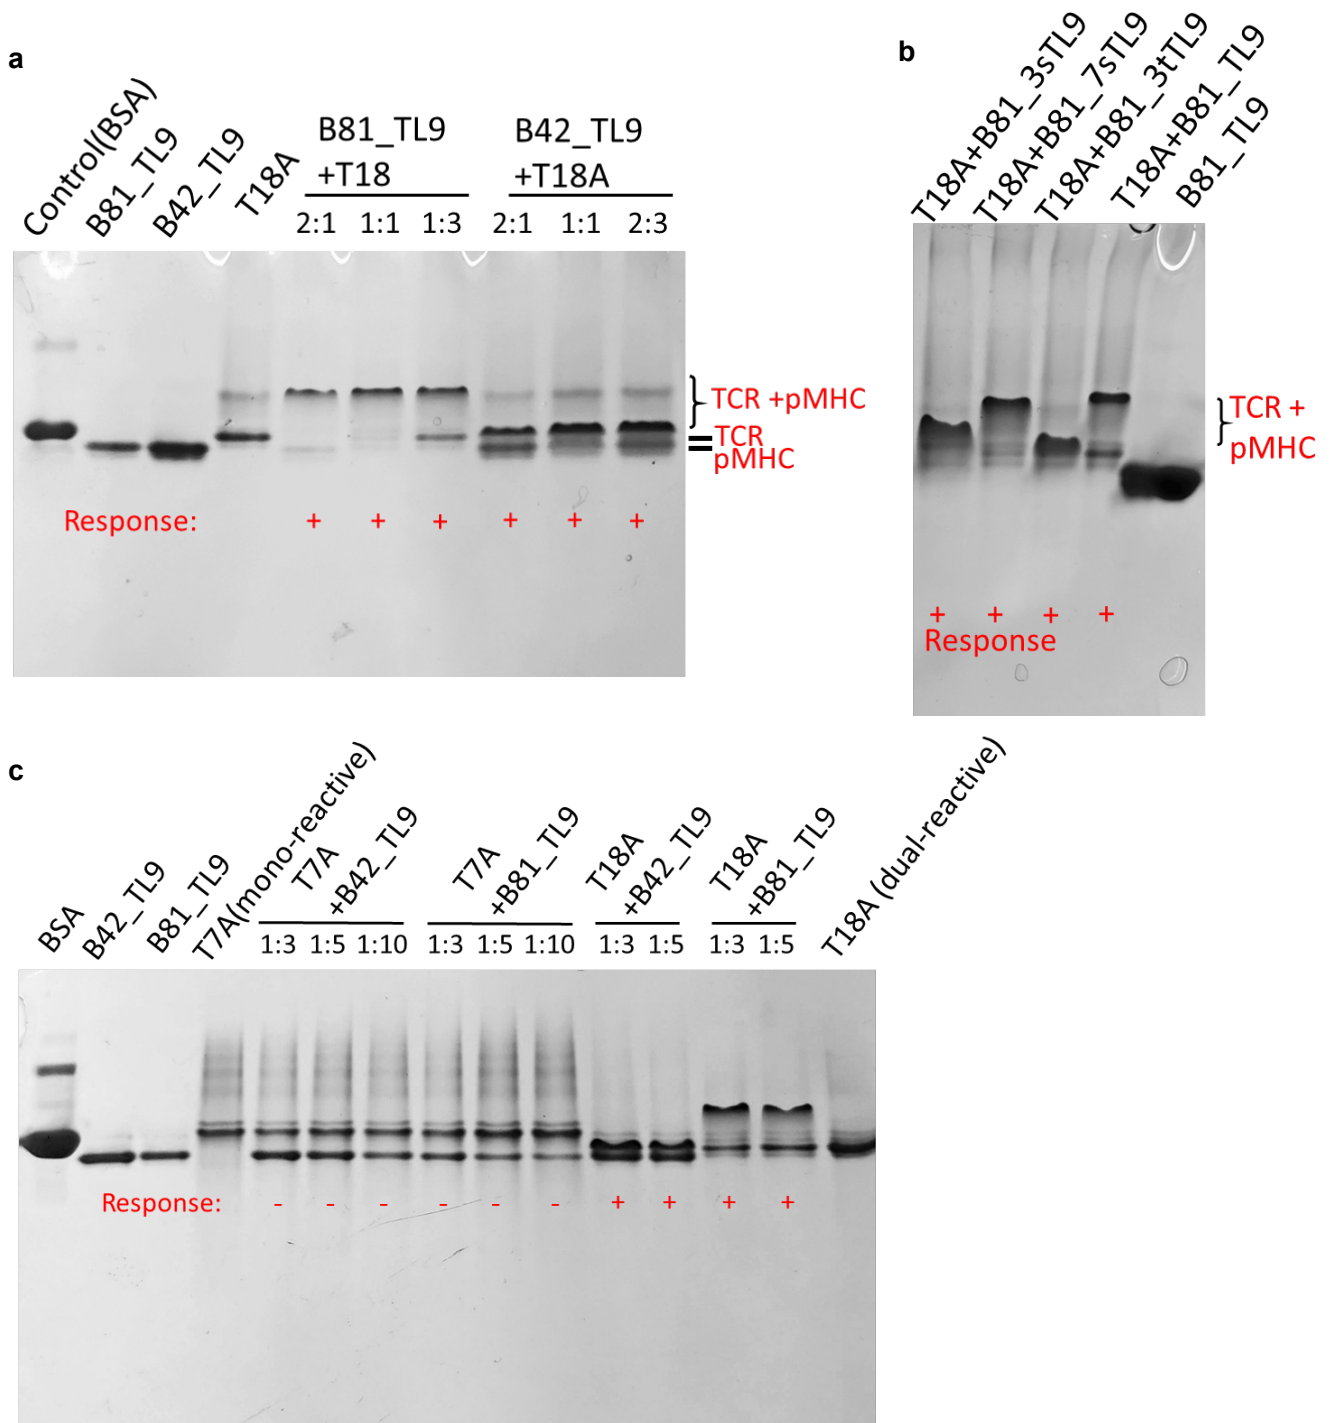

**Figure S5. Native-PAGE confirms the dual-reactivity of TCR T18A.** (a) The refolded B8101\_pTL9 and B4201\_pTL9 protein complexes are mixed with refolded TCR T18A separately. Compare to the print of B8101\_pTL9, B4201\_pTL9, and TCR only, the mixture shows positive interactions by clearly migration on the gel and demonstrate the interaction is indeed happened. This result also validate that the refolding of pMHC and TCR in vitro are successful, and with biological function to interact with each other. (b) Different migration of T18A and B81\_mutated peptide confirms the ability to recognize TL9 escape variants of this TCR. (c) The negative response of single reactive TCT T7A towards B4201\_pTL9 is shown, which is consistent to its weak SPR signals in affinity measurement assays.

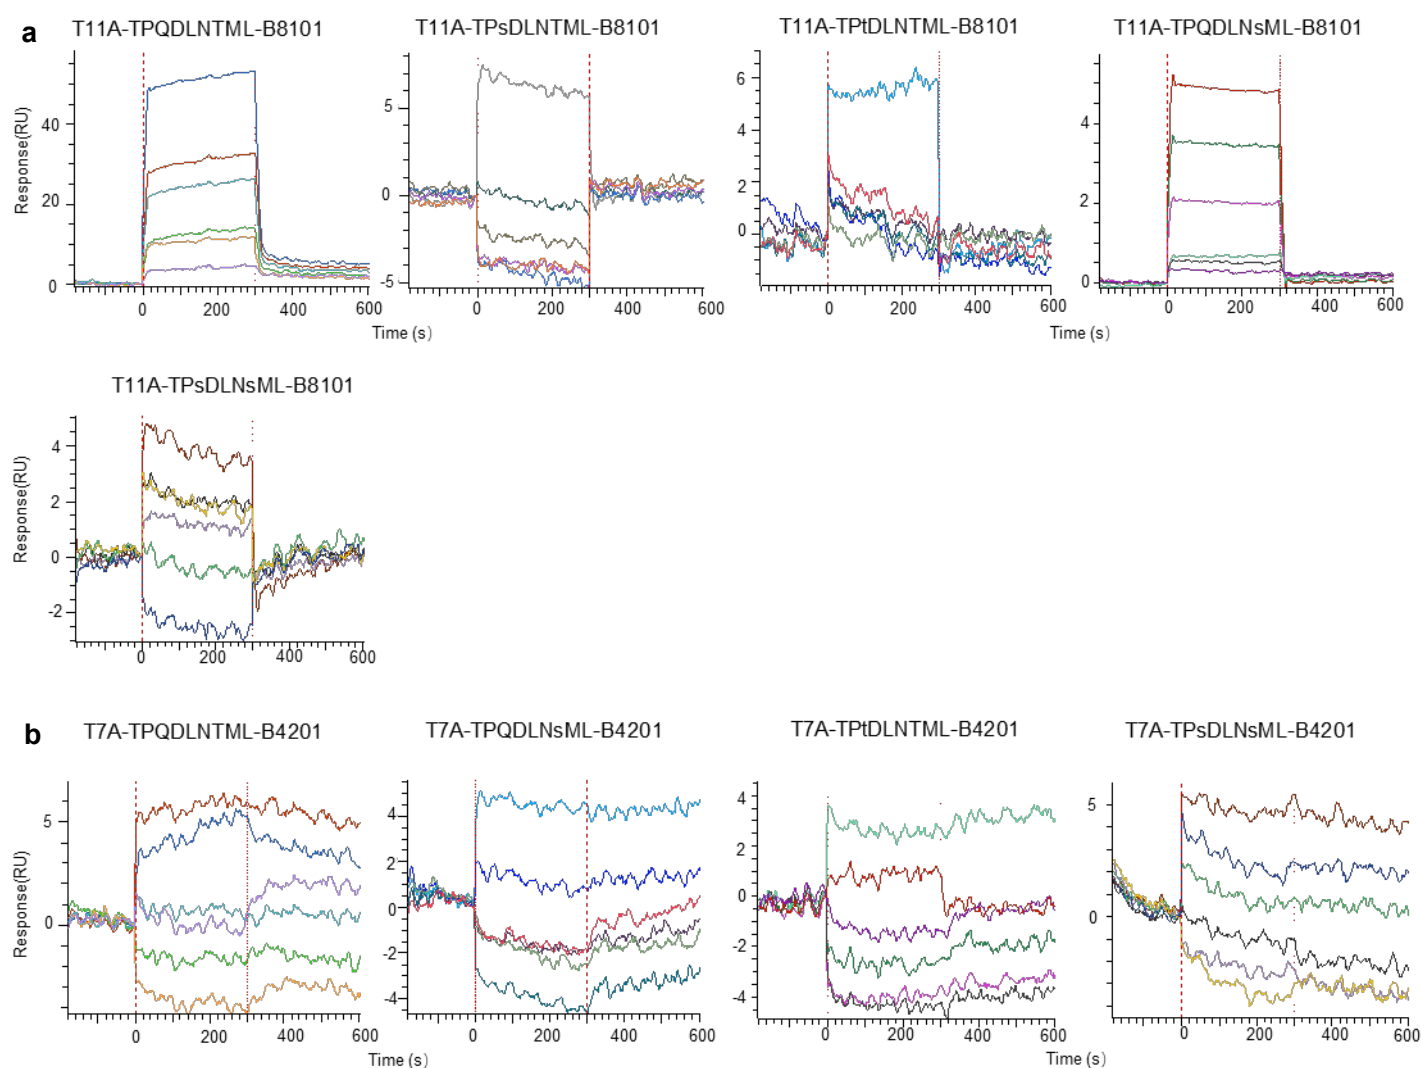

**Fig S6 Binding curves determined by SPR for mono-reactive TCRs and TL9 mutants.** The B8101-derived, mono-reactive TCR T11A (a) and B4201-derived, mono-reactive TCR T7A (b) were captured on the surface, and HLA loading WT TL9 peptide or mutated TL9 peptide were injected to the surface. The affinity was measured in response unit (RU).

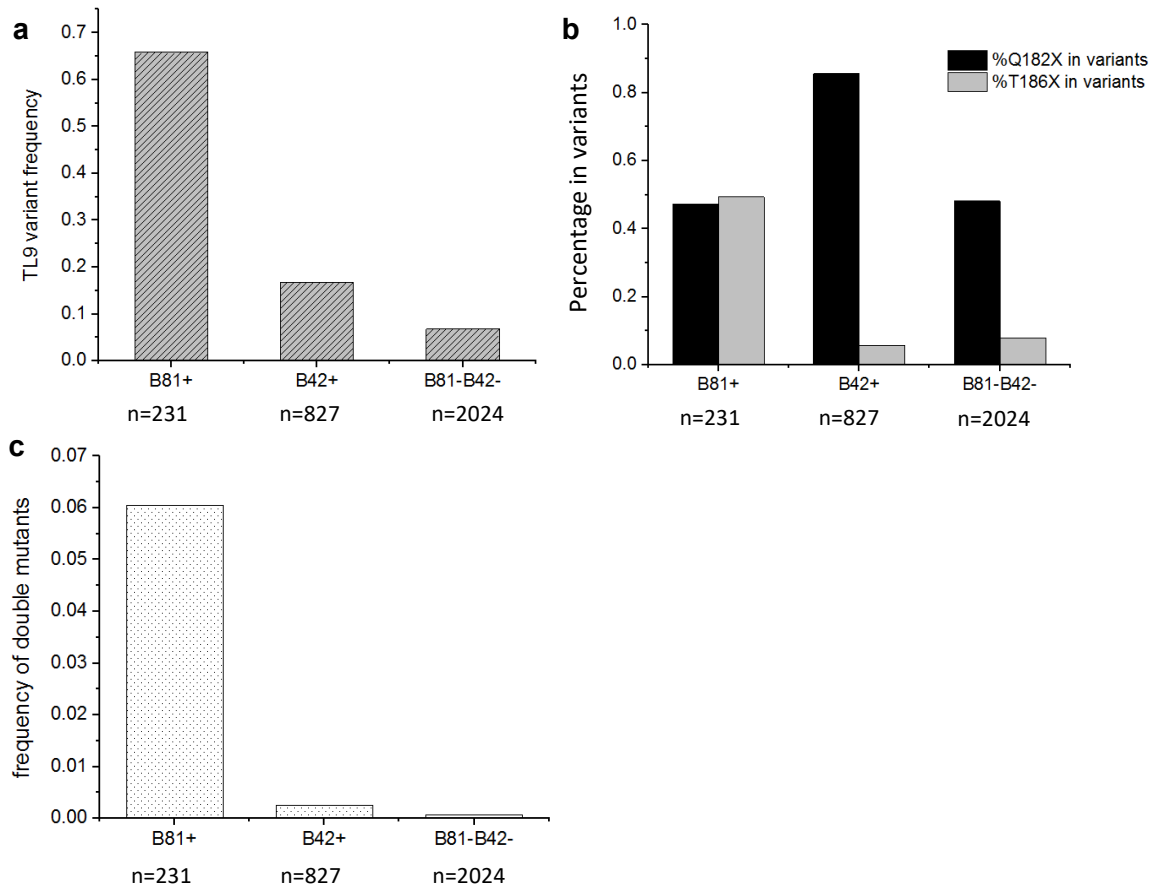

**Figure S7. Mutation characteristics of Gag TL9 epitope of HIV-1 in African population.** (a) Comparison of TL9 epitope mutation frequency between HLA B\*81:01 positive, HLA B\*42:01 positive, and B\*81:01/B\*42:01 negative population. (b) Q182X mutation proportion and T186X mutation proportion on TL9 epitope. (c) The frequency of double mutant on TL9 epitope in HIV patients.

**Table S1. Data collection and refinement statistics of TCR-peptide-HLA complexes.**

|                                | T18A TCR HLA-B81-Gag-TL9      | T18A TCR HLA-B42-Gag-TL9     |
|--------------------------------|-------------------------------|------------------------------|
| <b>Data collection</b>         |                               |                              |
| Space group                    | P 43 21 2                     | P 43 21 2                    |
| Cell dimensions a, b, c (Å)    | 93.098, 93.098, 263.051       | 96.992, 96.992, 263.839      |
| Resolution (Å)                 | 46.55 - 2.24                  | 47.7 - 2.63                  |
| Total no. of observations      | 113047 (11093)                | 76952 (7464)                 |
| No. of unique observations     | 56526 (5547)                  | 38478 (3733)                 |
| Multiplicity                   | 2.0 (2.0)                     | 2.0 (2.0)                    |
| Data completeness (%)          | 100.00 (100.00)               | 100.00 (100.00)              |
| I/ $\sigma$                    | 15.84 (2.00)                  | 14.76 (2.25)                 |
| R-merge                        | 0.03414 (0.3732)              | 0.03554 (0.2992)             |
| R-meas                         | 0.04828 (0.5277)              | 0.05027 (0.4232)             |
| <b>Refinement</b>              |                               |                              |
| Resolution (Å)                 | 46.55 - 2.242 (2.322 - 2.242) | 47.7 - 2.628 (2.722 - 2.628) |
| Reflections used in refinement | 56468 (5533)                  | 38422 (3725)                 |
| R-work                         | 0.2002 (0.2722)               | 0.2176 (0.3003)              |
| R-free                         | 0.2438 (0.3701)               | 0.2661 (0.4115)              |
| Number of non-hydrogen atoms   | 7012                          | 6802                         |
| Protein                        | 6664                          | 6716                         |
| Water                          | 348                           | 118                          |
| r.m.s.d. from ideality         |                               |                              |
| Bond lengths (Å)               | 0.008                         | 0.003                        |
| Bond angles (°)                | 0.9                           | 0.64                         |
| Ramachandran plot statistics   |                               |                              |
| favored (%)                    | 97                            | 92.7                         |
| allowed (%)                    | 3                             | 6.8                          |
| outliers (%)                   | 0.2                           | 0.3                          |



**Table S2. Contact table of T18A/HLA-B\*81:01/TL9 and T18A/HLA-B\*42:01/TL9**

| TCR segment   | TCR residues   | HLA-B8101                                           | Type of bond |
|---------------|----------------|-----------------------------------------------------|--------------|
| CDR1 $\alpha$ | ASN32 $\alpha$ | GLU165 $\alpha$                                     | VDW          |
| CDR1 $\alpha$ | TYR34 $\alpha$ | GLU156 $\alpha$ , ARG153 $\alpha$                   | VDW, HB      |
| CDR3 $\alpha$ | LEU95 $\alpha$ | GLN157 $\alpha$ , GLU156 $\alpha$ , ALA160 $\alpha$ | VDW, HB      |
| CDR3 $\alpha$ | ASN96 $\alpha$ | GLU165 $\alpha$                                     | HB           |
| CDR2 $\beta$  | ASN52 $\beta$  | THR75 $\alpha$ , LYS148 $\alpha$                    | VDW          |
| CDR2 $\beta$  | ASN53 $\beta$  | GLU78 $\alpha$                                      | VDW          |
| CDR2 $\beta$  | VAL54 $\beta$  | GLN74 $\alpha$ , THR75 $\alpha$                     | VDW          |
| FW $\beta$    | ILE56 $\beta$  | ALA71 $\alpha$                                      | VDW          |
| CDR3 $\beta$  | LEU97 $\beta$  | ALA151 $\alpha$                                     | VDW          |
| CDR3 $\beta$  | GLY98 $\beta$  | ALA152 $\alpha$                                     | VDW          |
| CDR3 $\beta$  | ILE99 $\beta$  | AGR153 $\alpha$ , GLN157 $\alpha$ , GLU156 $\alpha$ | VDW          |
| CDR3 $\beta$  | ASP100 $\beta$ | ARG153 $\alpha$                                     | VDW          |
| TCR segment   | TCR residue    | TL9 peptide                                         | Type of bond |
| CDR3 $\alpha$ | LEU95 $\alpha$ | P5-LEU                                              | VDW          |
| CDR3 $\alpha$ | ASN96 $\alpha$ | P4-ASP                                              | VDW, HB      |
| CDR3 $\alpha$ | ASN97 $\alpha$ | P4-ASP, P5-LEU, P6-ASN                              | VDW, HB      |
| CDR3 $\alpha$ | ALA98 $\alpha$ | P4-ASP                                              | VDW          |
| CDR2 $\beta$  | ASN51 $\beta$  | P6-ASN                                              | VDW          |
| CDR2 $\beta$  | ASN52 $\beta$  | P6-ASN, P8-MET                                      | VDW          |
| FW $\beta$    | ILE56 $\beta$  | P6-ASN                                              | VDW          |

  

| TCR segment   | TCR residue         | HLA-B4201                                                                               | Type of bond |
|---------------|---------------------|-----------------------------------------------------------------------------------------|--------------|
| CDR1 $\alpha$ | ASN32 $\alpha$      | ALA160 $\alpha$                                                                         | VDW          |
| CDR1 $\alpha$ | TYR34 $\alpha$ -OH  | ARG153 $\alpha$ -NH2, GLU156 $\alpha$                                                   | HB,VDW       |
| CDR3 $\alpha$ | LEU95 $\alpha$ -O   | GLN157 $\alpha$ -NE2, GLU156 $\alpha$ -OE1, -<br>OE2, LEU157 $\alpha$ , ALA160 $\alpha$ | HB,VDW       |
| CDR2 $\beta$  | ASN52 $\beta$       | GLU78 $\alpha$                                                                          | VDW          |
| CDR2 $\beta$  | ASN53 $\beta$       | GLU78 $\alpha$                                                                          | VDW          |
| CDR2 $\beta$  | VAL54 $\beta$       | GLN74 $\alpha$ , THR75 $\alpha$ , GLU78 $\alpha$                                        | VDW          |
| FW $\beta$    | ILE56 $\beta$       | ALA71 $\alpha$                                                                          | VDW          |
| CDR3 $\beta$  | LEU97 $\beta$       | ALA151 $\alpha$                                                                         | VDW          |
| CDR3 $\beta$  | GLY98 $\beta$       | ALA152 $\alpha$                                                                         | VDW          |
| CDR3 $\beta$  | ILE99 $\beta$ -O    | ARG153 $\alpha$ -NH1, GLU156 $\alpha$ ,<br>GLN157 $\alpha$ , ALA152 $\alpha$ -O         | HB, VDW      |
| CDR3 $\beta$  | ASP100 $\beta$ -OD1 | ARG153 $\alpha$ -NH1                                                                    | SB, HB       |
| TCR segment   | TCR residue         | TL9 peptide                                                                             | Type of bond |
| CDR3 $\alpha$ | ASN96 $\alpha$      | P4-ASP                                                                                  | VDW          |
| CDR3 $\alpha$ | ASN97 $\alpha$      | P4-ASP, P5-LEU, P6-ASN                                                                  | VDW          |
| CDR3 $\alpha$ | ALA98 $\alpha$ -N   | P4-ASP-OD1                                                                              | HB, VDW      |
| CDR2 $\beta$  | ASN51 $\beta$ -ND2  | P6-ASN-O                                                                                | HB, VDW      |
| CDR2 $\beta$  | ASN52 $\beta$ -ND2  | P6-ASN-O, P8-MET                                                                        | HB, VDW      |
| FW $\beta$    | ILE56 $\beta$       | P6-ASN                                                                                  | VDW          |

VDW: Van der Waals interaction (cut-off at 4 Å), HB: hydrogen bond (cut-off at 3.5 Å), SB: salt bridge (cut-off at 5 Å).

**Table S3. HLA-associated variation in TL9-Gag from studies in last decade.**

| B8101, N=231         | epitope   | n    | %        |
|----------------------|-----------|------|----------|
|                      | TPQDLNTML | 79   | 0.341991 |
|                      | --X-----  | 72   | 0.311688 |
|                      | -----X--  | 75   | 0.324675 |
|                      | others    | 5    | 0.021645 |
| B4201, N=827         | epitope   | n    | %        |
|                      | TPQDLNTML | 688  | 0.831923 |
|                      | --X-----  | 119  | 0.143894 |
|                      | -----X--  | 8    | 0.009674 |
|                      | others    | 12   | 0.01451  |
| B8101-B4201-, N=2034 | epitope   | n    | %        |
|                      | TPQDLNTML | 1895 | 0.931662 |
|                      | --X-----  | 67   | 0.03294  |
|                      | -----X--  | 11   | 0.005408 |
|                      | others    | 61   | 0.02999  |
